# Supplementary material for: Understanding and addressing changing administrative workload in primary care in Canada: protocol for a mixed-method study
Source: PubMed Central journal article supplement — BMJ Open. 2023 Dec 12;13(12):e076917. doi: 10.1136/bmjopen-2023-076917 (PMC10729089; doi:10.1136/bmjopen-2023-076917), 2023-12-12
Supplement: bmjopen-2023-076917.draft_revisions.pdf [file bmjopen-2023-076917.draft_revisions.pdf]

# BMJ Open

BMJ Open is committed to open peer review. As part of this commitment we make the peer review history of every article we publish publicly available.

When an article is published we post the peer reviewers' comments and the authors' responses online. We also post the versions of the paper that were used during peer review. These are the versions that the peer review comments apply to.

The versions of the paper that follow are the versions that were submitted during the peer review process. They are not the versions of record or the final published versions. They should not be cited or distributed as the published version of this manuscript.

BMJ Open is an open access journal and the full, final, typeset and author-corrected version of record of the manuscript is available on our site with no access controls, subscription charges or pay-per-view fees (<http://bmjopen.bmj.com>).

If you have any questions on BMJ Open's open peer review process please email [info.bmjopen@bmj.com](mailto:info.bmjopen@bmj.com)

# BMJ Open

## Understanding and addressing changing administrative workload in primary care in Canada: Protocol for a mixed method study

|                               |                                                                                                                                                                                                                                                                                                                                                                                                                                                                                                                                                                                                                                                                                                                                                                                                                                                                                                                                                                                                                                              |
|-------------------------------|----------------------------------------------------------------------------------------------------------------------------------------------------------------------------------------------------------------------------------------------------------------------------------------------------------------------------------------------------------------------------------------------------------------------------------------------------------------------------------------------------------------------------------------------------------------------------------------------------------------------------------------------------------------------------------------------------------------------------------------------------------------------------------------------------------------------------------------------------------------------------------------------------------------------------------------------------------------------------------------------------------------------------------------------|
| Journal:                      | <i>BMJ Open</i>                                                                                                                                                                                                                                                                                                                                                                                                                                                                                                                                                                                                                                                                                                                                                                                                                                                                                                                                                                                                                              |
| Manuscript ID                 | bmjopen-2023-076917                                                                                                                                                                                                                                                                                                                                                                                                                                                                                                                                                                                                                                                                                                                                                                                                                                                                                                                                                                                                                          |
| Article Type:                 | Protocol                                                                                                                                                                                                                                                                                                                                                                                                                                                                                                                                                                                                                                                                                                                                                                                                                                                                                                                                                                                                                                     |
| Date Submitted by the Author: | 22-Jun-2023                                                                                                                                                                                                                                                                                                                                                                                                                                                                                                                                                                                                                                                                                                                                                                                                                                                                                                                                                                                                                                  |
| Complete List of Authors:     | Lavergne, M.; Dalhousie University Faculty of Medicine, Department of Family Medicine; Simon Fraser University, Centre for Applied Research in Mental Health and Addiction<br>Moravac, Catherine; Dalhousie University Faculty of Medicine, Family Medicine<br>Bergen, Fiona; Dalhousie University Faculty of Medicine, Practice Ready Assessment Program<br>Buote, Richard; College of Family Physicians of Canada<br>Easley, Julie; Horizon Health Network, Family Medicine<br>Grudniewicz, Agnes; University of Ottawa, Telfer School of Management<br>Hedden, Lindsay ; Simon Fraser University,<br>Leslie, Myles; University of Calgary,<br>McKay, Madeleine; Doctors Nova Scotia<br>Marshall, Emily; Dalhousie University, Family Medicine<br>Martin-Meiser, Ruth; Dalhousie University, Faculty of Nursing<br>Mooney, Melanie; Nova Scotia Health Authority, Primary Health Care and Chronic Disease Management<br>Palmer, Erin; Dalhousie University Faculty of Medicine<br>Tracey, Joshua; Dalhousie University Faculty of Medicine |
| Keywords:                     | Primary Care < Primary Health Care, HEALTH SERVICES ADMINISTRATION & MANAGEMENT, Organisation of health services < HEALTH SERVICES ADMINISTRATION & MANAGEMENT                                                                                                                                                                                                                                                                                                                                                                                                                                                                                                                                                                                                                                                                                                                                                                                                                                                                               |
|                               |                                                                                                                                                                                                                                                                                                                                                                                                                                                                                                                                                                                                                                                                                                                                                                                                                                                                                                                                                                                                                                              |

SCHOLARONE™  
Manuscripts

1  
2  
3 **Understanding and addressing changing administrative workload in primary**  
4 **care in Canada: Protocol for a mixed method study**  
5  
6  
7

8 Author: Ruth Lavergne  
9

10 Co-Authors: Fiona Bergin  
11 Richard Buote  
12 Julie Easley  
13 Agnes Grudniewicz  
14 Lindsay Hedden  
15 Myles Leslie  
16 Madeleine McKay  
17 Emily Gard Marshall  
18 Ruth Martin-Misener  
19 Melanie Mooney  
20 Catherine Moravac  
21 Erin Palmer  
22 Joshua Tracey  
23  
24  
25  
26  
27

28 Corresponding Author: Dr. Ruth Lavergne  
29 Tier II Canada Research Chair in Primary Care  
30 Associate Professor  
31 Primary Care Research Unit  
32 Department of Family Medicine  
33 Dalhousie University  
34 1465 Brenton Street, Suite 402  
35 Halifax Nova Scotia  
36 B3J 3T4  
37 CANADA  
38  
39

40 [Ruth.lavergne@dal.ca](mailto:Ruth.lavergne@dal.ca)

41 Phone: 1-902-473-4741

42 Fax: 1-902-473-4760  
43  
44  
45  
46

47 Co-Authors: Fiona Bergin  
48 Dalhousie University  
49 Halifax, Nova Scotia  
50 CANADA  
51  
52  
53  
54  
55  
56  
57

1  
2  
3  
4  
5 Richard Buote  
6 College of Family Physicians of Canada  
7 Mississauga, Ontario  
8 CANADA  
9

10  
11 Julie Easley  
12 Horizon Health Network  
13 Fredericton, New Brunswick  
14 CANADA  
15

16  
17 Agnes Grudniewicz  
18 Telfer School of Management  
19 University of Ottawa  
20 Ottawa, Ontario  
21 CANADA  
22

23  
24 Lindsay Hedden  
25 Simon Fraser University  
26 Burnaby, British Columbia  
27 CANADA  
28

29  
30 Myles Leslie  
31 University of Calgary  
32 Calgary, Alberta  
33 CANADA  
34

35  
36 Madeleine McKay  
37 Doctors Nova Scotia  
38 Dartmouth, Nova Scotia  
39 CANADA  
40

41  
42 Emily Gard Marshall  
43 Dalhousie University  
44 Halifax, Nova Scotia  
45 CANADA  
46

47  
48 Ruth Martin-Misener  
49 Dalhousie University  
50 Halifax, Nova Scotia  
51 CANADA  
52

1  
2  
3  
4  
5  
6  
7  
8  
9  
10  
11  
12  
13  
14  
15  
16  
17  
18  
19  
20  
21  
22  
23  
24  
25  
26  
27  
28  
29  
30  
31  
32  
33  
34  
35  
36  
37  
38  
39  
40  
41  
42  
43  
44  
45  
46  
47  
48  
49  
50  
51  
52  
53  
54  
55  
56  
57  
58  
59  
60

Melanie Mooney  
Nova Scotia Health Authority  
Yarmouth, Nova Scotia  
CANADA

Catherine Moravac  
Dalhousie University  
Halifax, Nova Scotia  
CANADA

Erin Palmer  
Dalhousie University  
St. John, New Brunswick  
CANADA

Joshua Tracey  
Dalhousie University  
St. John, New Brunswick  
Nova Scotia  
CANADA

**Key Words:** Primary Health Care  
Health Services Administration and Management  
Organization of Health Services  
Administrative Workload

**Word Count:** 3,623 words (excluding title page, references and figures)

# Understanding and addressing changing administrative workload in primary care in Canada: Protocol for a mixed method study

## Abstract

### *Introduction*

Many Canadians struggle to access the primary care they need while at the same time primary care providers report record levels of stress and overwork. There is an urgent need to understand factors contributing to the gap between a growing per-capita supply of primary care providers and declines in the availability of primary care services. The assumption of responsibility by primary care teams for services previously delivered on an in-patient basis, along with a rise in administrative responsibilities may be factors influencing reduced access to care.

### *Methods*

In this mixed methods study our first objective is to determine how the volume of services requiring primary care coordination has changed over time in the Canadian provinces of Nova Scotia and New Brunswick. We will collect quantitative administrative data to investigate how services have shifted in ways that may impact administrative workload in primary care. Our second objective is to use qualitative interviews with family physicians, nurse practitioners, and administrative team members providing primary care to understand how administrative workload has changed over time. We will then identify priority issues and practical response strategies using two deliberative dialogue events convened with primary care providers, clinical and system leaders, and policy makers.

### *Analysis*

We will analyze changes in service use data between 2001/2 and 2021/22 using annual total counts, rates per capita, rates per primary care provider, and per primary care service. We will conduct reflexive thematic analysis to develop themes and to compare and contrast participant responses reflecting differences across disciplines, payment and practice models, and practice settings. Areas of concern and potential solutions raised during interviews will inform deliberative dialogue events.

### *Ethics and Dissemination*

We received research ethics approval from Nova Scotia Health (#1028815). Knowledge translation will occur through dialogue events, academic papers, and presentations at national and international conferences.

## Strengths & Limitations

- This is the first study to collect qualitative research data from Canadian primary care physicians, nurse practitioners and administrative staff about changes in administrative workload.
- The study aims to identify priority issues and develop practical response strategies to make administrative work more efficient.
- A population level analysis will be conducted rather than an individual level analysis due to logistical data collection challenges, and time and budget constraints.
- Data brought together in this study can support future cross-provincial work involving individual-level quantitative analysis exploring the intersecting effects of aging and complexity of medical management on primary care capacity.

## Introduction

There are more primary care providers per person than ever before in Canada.<sup>1</sup> At the same time, primary care is described as being in crisis,<sup>2-4</sup> as Canadians struggle to access needed care<sup>5</sup> and primary care providers report record levels of stress and overwork.<sup>6</sup> There is an urgent need to understand factors contributing to the gap between a growing per-capita supply of primary care providers and declines in the availability of primary care services.<sup>7</sup> Shifts in service provision that have moved care and its coordination out of acute facilities and into the community, along with increases in administrative activity that include work related to caring for individual patients as well as clinic administration have changed the workload in primary care. Neither the extent of these changes, nor their impact on provider experience and patient access have been carefully studied.<sup>6</sup>

Beyond patient visits, primary care providers (including family physicians (FPs) and nurse practitioners (NPs)) are responsible for indirect patient care activities such as arranging prescriptions, lab tests, imaging, specialist referrals, and medical forms, as well as maintaining a longitudinal patient record.<sup>8</sup> Over the past 20 years we have seen a shift in care from hospitals to communities,<sup>9</sup> a proliferation of guidelines and increased complexity in the management of common chronic conditions,<sup>10-13</sup> and accelerating population aging.<sup>14,9,15</sup> The intersecting effects of these trends may mean that there is greater need than ever for care coordination or indirect patient care, contributing to expanding administrative workload in primary care. Navigating electronic medical records, complicated referral processes, and cumbersome forms, may be increasing the time needed to complete indirect patient related tasks. Patients may be referred by primary care providers to programs or specialists as part of the overall care plan. These referrals however often result in additional administrative work and record-keeping responsibilities. Paperwork and tasks flow back to primary care from referral sources, further increasing workload. In addition to administrative responsibilities related to care coordination, primary care providers play varied roles in clinic administration, depending on service delivery model.

1  
2  
3 Administrative workload has been described as a source of burnout and reduced access to care  
4 for patients, and may push family physicians to choose options other than comprehensive  
5 community-based practice.<sup>16</sup> This has been casually called “death by a thousand papercuts” or  
6 more recently “death by a thousand clicks.”<sup>17</sup> Under this view, time spent on a variety of  
7 administrative tasks is secondary to the ‘real’ work of primary care. Indeed administration has  
8 been broadly characterized as taking away from other patient care activities, thereby making  
9 health systems less efficient and also less equitable, as people who most need coordinated care  
10 may struggle to access it.<sup>7,18</sup> At the same time, administrative work is central to delivering  
11 coordinated and integrated care to patients and to clinic operations.  
12  
13  
14

15 Outcomes of a survey conducted by Doctors Nova Scotia published in December 2021 revealed  
16 that administrative burdens were included among the top three challenges facing primary care  
17 physicians in that province.<sup>19</sup> The magnitude of this problem led to the involvement of the  
18 Office of Regulatory Affairs and Service Effectiveness (ORASE) of the Nova Scotia government to  
19 investigate and implement concrete action plans to address unnecessary administrative  
20 burdens on physicians.<sup>20</sup> With the support of Doctors Nova Scotia, a survey administered by  
21 ORASE found that 38% of physicians’ time was spent on unnecessary administrative tasks, and  
22 that 24% of that work could have been done by someone in a different role/profession.<sup>20</sup> The  
23 survey also found that physicians believed that 14% of that work could be entirely  
24 eliminated.<sup>20</sup> The report on the survey noted that the main contributors to unnecessary  
25 administrative tasks were: the completion of medical forms, doctor’s notes, business  
26 operations, billing, including shadow billing, licensing, privileging, and tasks associated with  
27 requirements of government and oversight entities. Importantly, physicians indicated that  
28 administrative burdens significantly contributed to burnout, and that reductions of time spent  
29 on these tasks would allow time for improved work/life balance and improved patient  
30 care.<sup>20</sup> While administrative burden is a problem for all acute, specialist, and primary care  
31 physicians in Nova Scotia, given the unique role primary care physicians play in coordinating  
32 care, we need detailed information about, and solutions for, this setting.  
33  
34  
35  
36  
37  
38

39 The impact of administrative burdens in primary care are complex. It is not simply a problem of  
40 too much paperwork. Family physicians and nurse practitioners are also increasingly  
41 responding to issues related to patients’ social determinants of health without adequate  
42 support and resources, often resulting in frustration, stress, and emotional burden.<sup>20</sup> Wait  
43 times for specialist referrals translate to lengthier periods of patient management, additional  
44 paperwork, follow-up on referrals, and carrying the emotional burden of patients’ unmet  
45 needs. Added to these pressures are expectations to take on more ‘unattached’ patients, while  
46 not having the time or capacity to do so because of the complexity of care required by existing  
47 patients coupled with heavy administrative burdens. While the emotional toll of administrative  
48 burden on primary care providers is not the focus of this study, it is important to recognize that  
49 there are many concerning ripple effects that accompany this problem.  
50  
51  
52

53 A 2023 study<sup>21</sup> built on the findings of the ORASE’s Physician Administrative Burden Survey  
54 conducted in Nova Scotia. Study outcomes demonstrated that a 10% reduction of unnecessary  
55 paperwork for primary care physicians in New Brunswick would equal an additional 119,726  
56  
57



1  
2  
3 patient visits annually.<sup>22</sup> While increased recognition of this problem and attempts to address it  
4 are welcome, it comes with an implicit expectation that primary care providers will have the  
5 capacity to see new patients and/or increase the number of visits for existing patients. This  
6 expectation may add to primary care provider stress and emotional burden.  
7  
8

9 While there is some limited qualitative research with primary care physicians in the United  
10 States,<sup>23</sup> none yet exists in Canada. We also need information drawing on the experience and  
11 expertise of nurse practitioners, clinic managers, medical office assistants, and other primary  
12 care team members with administrative responsibilities. New information to understand the  
13 extent and drivers of administrative workload, as well as the strategies required to make this  
14 activity more efficient are urgently needed.  
15  
16  
17

### 18 **Study Objectives**

19  
20 This project will address three objectives and nested research questions, with the overarching  
21 goal of adjusting administrative workload, while ensuring efficient, accountable, and well-  
22 coordinated care:  
23

- 24 1. Determine how the volume of services requiring primary care coordination has changed  
25 over time
  - 26 a. How has service volume shifted from inpatient services to outpatient and  
27 community-based services requiring coordination through primary care?
  - 28 b. How has the volume of outpatient services requiring primary care coordination and  
29 oversight (i.e., prescriptions, testing, imaging, and specialist consultations) changed  
30 over time?  
31  
32
- 33 2. Use interviews with primary care providers (family physicians and nurse practitioners)  
34 and administrative team members to understand how administrative workload has  
35 changed:
  - 36 a. What are current experiences of administrative workload, including work related to  
37 patient care and clinic administration?
  - 38 b. How has administrative workload changed over time? What factors have shaped  
39 changes?  
40
  - 41 c. What are areas of particular concern and how might these be addressed?  
42  
43
- 44 3. Drawing on the findings of Objectives 1 and 2, with primary care providers and service  
45 planners, co-identify priority issues and co-develop practical response strategies to  
46 make administrative work more efficient:
  - 47 a. Which areas of concern are addressable in the short, medium and long term?
  - 48 b. What actions would be needed, who is in a position to act, and what resources would  
49 be involved?  
50  
51  
52  
53  
54  
55  
56  
57  
58  
59  
60

## Methods

This two-year study (June 2023 - May 2025) will use different data sources and methodologies to address each project objective within two study provinces, Nova Scotia and New Brunswick. Findings of descriptive quantitative analysis under Objective 1 and in-depth qualitative interviews under Objective 2 will inform deliberative dialogues used to address Objective 3.

### *Objective 1 - Quantitative administrative data*

To address Objective 1 we will seek out and combine administrative data from multiple sources to create a more complete picture of shifts in service use over time, accessing data from 2001/2 (or earliest available, depending on dataset) and 2021/2022 (or most recent available). This time frame will allow us to explore long-term trends, as well as changes since March 2020 due to the pandemic. We do not need access to individual, record-level data to meet study objectives and plan only population-level analysis. To address question 1a we will combine publicly-available data accessible through the Canadian Institutes of Health Information at the provincial level to examine trends in hospital services use as well as services delivered on an outpatient basis or in the community. To examine trends in hospitalizations, we will count the number of discharges recorded in the Discharge Abstract Database (DAD) and the number of days patients spent in hospital. To capture outpatient service use, we will use the National Physician Database (NPD) to track number of visits with primary care physicians, as well as with medical specialists and surgical specialists. We will use the DAD to count the number of day surgery procedures. Finally, we will use the National Health Expenditures Database to triangulate findings about service volume, examining shifts in spending between hospitals and other categories of healthcare over time.

To address question 1b we will track total laboratory tests and imaging services completed for outpatients, as FP/NPs have a role in reviewing and coordinating these even when ordered by other physicians. Public prescription data for seniors will be used to count the number of different drugs dispensed per year, at the level of the first 5 digits of the Anatomical Therapeutic Chemical classification (ATC) code.<sup>24</sup> We will exclude vaccines (J07), vitamins (A11), mineral supplements (A12), tonics (A13) and various (V) categories. As with lab tests, as FP/NPs have a role in managing all prescriptions, we will report the total. We will use MSI data to refine measures of specialist physician visit data, focusing on those seen as outpatients with FP/NPs as referrers, as reports would go back to them for patient follow-up.

*Quantitative Analysis:* Our approach is descriptive; it is not necessary to link datasets at the individual level. We will present service use data as annual total counts (to capture how total workload has changed), as rates per capita (to capture how patient-level care has changed), as well as rates per primary care provider, and per primary care service (to capture how changes in workload map onto primary care workforce supply and practice volume).

## Objective 2 - In-depth video interviews

*Interviews:* We will use interviews with primary care providers (FPs, NPs, and other team members involved in administration (clinic managers and/or medical office assistants) to understand their current administrative workload (including care coordination and other administrative activities), how this has changed over time, and what opportunities exist to manage this differently. We will conduct interviews via a secure online video platform. Interviews will last approximately one hour and will be scheduled at a time that is convenient and acceptable to study participants. This will allow us to reach a geographically varied set of participants at a lower cost than conducting in-person interviews. Video interviews have been shown to produce similar data richness when compared with in-person interviews.<sup>25,26</sup> Interviews will be conducted by Master's or PhD trained qualitative research staff. Interview data will be digitally recorded, professionally transcribed, quality checked for accuracy, and anonymized prior to analysis.

We will be interviewing primary care providers and administrative staff in New Brunswick as well as Nova Scotia to compare narratives between the two provinces, and to inform a planned Pan-Canadian study on this topic in the future.

*Recruitment:* We will purposively recruit primary care providers who are funded through a range of payment models (fee-for-service and alternate payment plans), who work in a range of clinic models (independent, health authority partnered, turn-key health authority operated), and who work in a range of geographic locations (urban and rural locations throughout each province). Specifically, we will recruit from Nova Scotia Health Primary Care Clinics, Dalhousie Family Medicine teaching sites, Doctors Nova Scotia, and Nurse Practitioners of New Brunswick. We plan sample sizes of 20 FP/NP and 20 administrative team member interviews to investigate differences by models and locations. The total sample size is forty (40). This sample size is consistent with recommendations for similar study designs.<sup>27-29</sup> Previous research we conducted concerning primary care practice was received with strong interest;<sup>30</sup> we anticipate similarly strong interest in this topic.

The project research associate will contact key individuals at recruitment organizations to explain the study and coordinate outreach. Key individuals at each site will distribute introductory emails along with a study poster. There will be a link from the poster to a brief screening survey. Potential participants selected for interviews will be contacted by the research associate. A participant information sheet will be provided at that time, and participants will have an opportunity to ask any questions they have before interviews are scheduled.

Gender is of central importance in this project. A substantial body of evidence shows that physician practice patterns are gendered, as are expectations with respect to care provision, including potentially administrative workload.<sup>31-33</sup> We will be attentive to gender in both interview recruitment and qualitative analysis. As an increasing proportion of family physicians are women, and 92% of nurse practitioners in Canada<sup>34</sup> are female we will actively recruit men

1  
2  
3 and ensure there are no barriers to participation for people with other genders. We will ask  
4 participants about how they perceive relationships between gender and administrative  
5 workload, and our analysis will explore how responses and experiences vary by gender.  
6  
7

8 *Informed Consent:* Consent is implied by completion of the online survey. This is clearly  
9 articulated in the introductory text to the survey. Before interviews commence, the research  
10 associate will review study aims, participant rights, and obtain verbal consent. The consent  
11 process will be audiotaped for documentation purposes.  
12  
13

14 *Data Management:* Quantitative and qualitative data and consent forms will be securely stored  
15 on encrypted password-protected computers.  
16  
17

18 *Qualitative Analysis:* We will employ Braun and Clarke's reflexive thematic analysis<sup>35</sup> which fits  
19 well with our critical qualitative approach<sup>36,37</sup> and relativist epistemology.<sup>38</sup> Our analysis will also  
20 be guided by social constructionism.<sup>39</sup> This blended approach reflects our positionality as active  
21 participants in the research process, our understanding that meaning is socially constructed,  
22 and the key role of reflexivity throughout the research process. We will use NVivo software as a  
23 tool in this work. We will begin by generating a detailed description of administrative workload  
24 (research question 2a). Analysis will occur concurrently with data collection and the interview  
25 guide will be iteratively adjusted if needed as our understanding of experiences of  
26 administrative workload develops. We will then expand analysis to explore changes over time  
27 (question 2b), and to make comparisons between FP/NP and administrative team member  
28 interviews, as well as to explore variation across payment model, practice model, and practice  
29 setting. To address research question 2c, and in preparation for Objective 3, we will group and  
30 compile areas of concern and potential solutions raised by participants.  
31  
32  
33

### 34 *Objective 3 - Integration of findings and knowledge exchange*

35  
36

37 We will work with partners on the team to identify relevant participants for a final two-phase  
38 dialogue event, designed to integrate and interpret both scientific and contextual data for the  
39 purpose of informing policy development,<sup>40</sup> in this case, strategies to address administrative  
40 workload. We will include 1) a subset of interview participants (primary care providers and  
41 administrative team members) working in varied contexts, 2) clinical leaders who can make  
42 changes within primary care service delivery environments, and 3) system administrators and  
43 policymaker leaders who can change processes that involve both primary care and other parts  
44 of the health system or sectors.  
45  
46

47 Prior to the first meeting, the study team will review quantitative findings and the initial list of  
48 areas of concern identified through qualitative interviews. These will be integrated into a  
49 background document circulated in advance of the dialogue process. Quantitative findings will  
50 inform changing administrative workload over time, and qualitative findings will provide  
51 context for areas of concern and potential solutions that will be explored during dialogue  
52 events. Dialogues will be conducted via video-conference in two stages. In the first stage,  
53 Nominal Group Technique (NGT)<sup>41,42</sup> will be used to guide discussion and prioritization of issues  
54  
55  
56

1  
2  
3 and solutions. Nominal Group Technique has been used since the 1960s for the identification  
4 of problems, priority ranking of issues, action items, or questions in small group in-person  
5 sessions. One of the technique's key strengths is it is designed for equal representation among  
6 participants and is non-hierarchical in nature. In this study, areas of concern generated and  
7 recorded in qualitative interviews will serve as a starting point for discussion, with participants  
8 invited to add topics not yet mentioned. In a ranking exercise, participants will be invited to  
9 consider which tasks are time consuming and/or offer lower value to patients and the system.  
10 Then participants will be asked to discuss and explain the reasons for their ranking.  
11  
12  
13

14 The second stage will focus on feasibility and actions needed to address high-priority areas of  
15 concern identified in the first event. Prior to the second stage, we will identify any additional  
16 participants with knowledge specific to areas of concern. Participants will be asked to consider  
17 which could be addressable in the short term (<3 months), medium term (3-12 months), and  
18 long term (one year or more). In breakout groups focusing on individual areas of concern,  
19 participants will be asked to consider what action would be needed and who would need to be  
20 involved. Each breakout group will be led by a facilitator briefed and prepared by the research  
21 team. After the breakout group discussions, there will be a debriefing with the full group of  
22 participants. The dialogue process will provide concrete and actionable strategies tailored to  
23 the primary care setting, that complement other ongoing work within Nova Scotia and New  
24 Brunswick health systems.  
25  
26  
27

#### 28 Impact on equity in recruitment and retention of healthcare professionals

29  
30  
31 Administrative workload directly impacts recruitment and retention of healthcare  
32 professionals, at times influencing family physicians to choose options other than community-  
33 based primary care as a strategy to circumvent burnout.<sup>16</sup> Expectations for coordination may  
34 vary by how primary care providers are gendered and racialized<sup>43</sup> ; women form a growing  
35 proportion of the primary care workforce.<sup>44</sup> Addressing coordination workload can therefore  
36 play a role in supporting equity in recruitment and retention of health care professionals.  
37 Understanding and supporting coordination of care is central to people-centred, flexible,  
38 quality healthcare. Identifying practical strategies to make coordination more efficient can  
39 support innovative healthcare models, and more seamless integration of virtual care into  
40 patients' journeys.  
41  
42  
43

#### 44 Patient and Public Involvement

45  
46  
47 Patients or members of the public were not involved in the design of this study and will not be  
48 involved during implementation. While our research questions respond to topics of patient and  
49 public interest, research approaches focus on routinely collected health system data and  
50 research participants are primary care providers and administrative staff. We therefore focus  
51 on including a range of policy and provider expertise and experience within the research team.  
52 Inclusion of patients in the deliberative dialogue events is not currently planned.  
53  
54  
55  
56  
57

## Study Limitations

Available quantitative data sources capture variables labeled “sex,” but there is no measure of gender, and administrative or legal sex may not correspond to sex assigned at birth. This is a limitation of secondary analysis of these data. Where possible, we will distinguish between patterns plausibly shaped by sex or gender in interpretation.

Care coordination activities are not recorded in administrative billing data. It is not possible to directly capture time spent on care coordination or other administrative work. Instead, we focus broadly on shifts in care delivery between hospital and community, as well as changes in services that require coordination, review, and/or administration on the part of primary care providers. It is beyond the scope and budget of this project to obtain access to linked, record-level data or to collect detailed time use data. Study objectives can be addressed through aggregate data that can be shared with no risk of identification. This project will form the groundwork for a future grant proposal that will use record-level data from the same sources to analyze changes over time by population age and generate projections of future primary care capacity.

## Ethics

Research ethics approval for this protocol was received from Nova Scotia Health (REB # 1028815) for research activities in both Nova Scotia and New Brunswick. This study conforms to the Declaration of Helsinki (June 1962; amended October 2013) and the Belmont Report (1979).

## Dissemination

We are taking an integrated knowledge translation approach<sup>45</sup> and have assembled a team that includes varied perspectives. Primary care provider co-investigators and policy partners affirm the urgent need to address administrative workload. We will present findings and seek feedback from the groups represented by partners and team members following completion of Objectives 1 and 2. Deliberative dialogues under Objective 3 are themselves a method for knowledge translation, designed to integrate and interpret data to inform strategies addressing administrative workload. This project will also yield traditional academic outputs crossing multiple disciplines and results will be disseminated to a range of audiences.

Results will inform healthcare delivery excellence that addresses opportunities for team-based care and the ability of healthcare providers to work to their full scope of practice. New or expanded roles for administrative and other primary care team members are being piloted in Nova Scotia. This pilot research will enrich the understanding of our research outcomes and also support ongoing innovation. Finally, a robust system of primary care is fundamental to addressing health inequalities in access to care. There is evidence of declining equity in access to primary care in Canada.<sup>7</sup> Limited primary care capacity and inadequate systems of coordination impact patients with more complex health and social needs most severely. High-performing systems of primary care can connect health care with other community resources.

This coordination is needed to support collaborative approaches to address the social determinants of health.

*3,623 words*

### **Author Affiliations**

<sup>1</sup>Department of Family Medicine, Dalhousie University, Nova Scotia, Canada.

<sup>2</sup>Horizon Health Network, Fredericton, New Brunswick, Canada.

<sup>3</sup>Telfer School of Management, University of Ottawa, Ottawa, Ontario, Canada.

<sup>4</sup>Faculty of Health Sciences, Simon Fraser University, Burnaby, British Columbia, Canada.

<sup>5</sup>School of Public Policy, University of Calgary, Alberta, Canada.

<sup>6</sup>Doctors Nova Scotia, Halifax, Nova Scotia, Canada.

<sup>7</sup>School of Nursing, Faculty of Health, Dalhousie University, Nova Scotia, Canada.

<sup>8</sup>Nova Scotia Health, Halifax, Nova Scotia, Canada.

<sup>9</sup>Department of Family Medicine, Dalhousie University, St. John's, New Brunswick, Canada.

### **Author Contributions:**

RL wrote the first draft of the Introduction and Objective 1 methods. CM wrote the first draft of Objective 2 methods. FB, RB, JE, LH, ML, MM, EGM, RMM, MM, EP and JT provided feedback and revisions on the draft protocol and approved the final version for submission.

**Funding:** This study is supported by Research Nova Scotia

**Competing Interests:** None declared

**Patient and public involvement:** There was no patient or public involvement in the development of this protocol. Refer to methods section, page 8.

**Patient consent for publication:** N/A

**Provenance and peer review:** Not commissioned; peer reviewed for ethical and funding approval prior to submission.

**Data availability statement:** Data sharing not applicable as no datasets generated or analyzed for this study

### **ORCIDs**

Ruth Lavergne <http://orcid.org/0000-0002-4205-4600>

Fiona Bergin <http://orcid.org/0009-0001-4503-2933>.

Richard Buote <http://orcid.org/0000-0001-7981-7854>

Julie Easley <http://orcid.org/0000-0002-1711-1343>

Agnes Grudniewicz <http://orcid.org/0000-0003-2960-8178>

1  
2  
3 Lindsay Hedden <http://orcid.org/0000-0001-9552-1324>  
4 Myles Leslie <http://orcid.org/0000-0001-5759-7993>  
5 Madeleine McKay <http://orcid.org/0009-0003-0652-2678>  
6 Emily Gard Marshall <http://orcid.org/0000-0001-8327-0329>  
7 Ruth Martin-Misener <https://orcid.org/0000-0003-4554-7635>  
8 Melanie Mooney <http://orcid.org/0000-0002-2520-3168>  
9 Catherine Moravac, <http://orcid.org/0000-0002-3000-4980>  
10 Erin Palmer <http://orcid.org/0009-0000-6742-8640>.  
11 Joshua Tracey <http://orcid.org/0009-0009-0559-6273>  
12  
13  
14  
15  
16  
17  
18  
19  
20  
21  
22  
23  
24  
25  
26  
27  
28  
29  
30  
31  
32  
33  
34  
35  
36  
37  
38  
39  
40  
41  
42  
43  
44  
45  
46  
47  
48  
49  
50  
51  
52  
53  
54  
55  
56  
57  
58  
59  
60

For peer review only



## References

1. Canadian Institute for Health Information. *Supply, Distribution and Migration of Physicians in Canada, 2020- Data Tables*. CIHI; 2021.
2. Walsh M, Pearson H. *Nova Scotia Doctor Calls Family Doctor Shortage a "Crisis."* Accessed June 6, 2017. <http://globalnews.ca/news/3270444/nova-scotia-doctor-calls-family-doctor-shortage-a-crisis/>
3. The evolving crisis in primary care. *British Columbia Medical Journal*. Accessed August 16, 2022. <https://bcmj.org/editorials/evolving-crisis-primary-care>
4. Opinion: Canada has a primary-care crisis. Here are three steps we must take to solve this problem. *The Globe and Mail*. <https://www.theglobeandmail.com/opinion/article-canada-has-a-primary-care-crisis-here-are-three-steps-we-must-take-to/>. Published July 16, 2022. Accessed August 16, 2022.
5. Canadian Institute for Health Information. *How Canada Compares: Results from the Commonwealth Fund's 2020 International Health Policy Survey of the General Population in 11 Countries*. CIHI; 2021.
6. Sovran V, Ytsma A, Johnson LH and T. Coordination of Care Could Improve: Canadian Results from the Commonwealth Fund International Health Policy Survey of Primary Care Physicians. *Healthcare Quarterly*. 2020;23(2). Accessed March 28, 2022. <https://www.longwoods.com/content/26283/coordination-of-care-could-improve-canadian-results-from-the-commonwealth-fund-international-health>
7. Lavergne MR, Bodner A, Peterson S, et al. Do changes in primary care service use over time differ by neighbourhood income? Population-based longitudinal study in British Columbia, Canada. *Int J Equity Health*. 2022;21(1):80. doi:10.1186/s12939-022-01679-4
8. College of Family Physicians of Canada. *Family Medicine Professional Profile*. College of Family Physicians of Canada; 2018.
9. Chappell N, Hollander M. An Evidence-Based Policy Prescription for An Aging Population. *Healthcare Papers*. 2011;11(1):8-18. doi:10.12927/hcpap.2011.22246
10. Adams WL, McIlvain HE, Lacy NL, et al. Primary care for elderly people: Why do doctors find it so hard? *The Gerontologist*. 2002;42(6):835-842. doi:10.1093/geront/42.6.835
11. Mangin D, Sweeney K, Heath I. Preventive health care in elderly people needs rethinking. *BMJ*. 2007;335(7614):285-287. doi:10.1136/bmj.39241.630741.BE1
12. Korownyk C, McCormack J, Kolber MR, Garrison S, Allan GM. Competing demands and opportunities in primary care. *Canadian Family Physician*. 2017;63(9):664-668.

13. Millar E, Stanley J, Gurney J, et al. Effect of multimorbidity on health service utilisation and health care experiences. *J Prim Health Care*. 2018;10(1):44-53. doi:10.1071/HC17074
14. Barer ML, Evans RG, Hertzman C. Avalanche or glacier?: Health care and the demographic rhetoric. *Canadian Journal on Aging / La Revue canadienne du vieillissement*. 1995;14(2):193-224. doi:10.1017/S0714980800011818
15. Canadian Institute for Health Information. *Health Care in Canada, 2011: A Focus on Seniors and Aging*. Canadian Institute for Health Information; 2012. Accessed April 20, 2022. <https://www.deslibris.ca/ID/230734>
16. Kabir M, Randall E, Mitra G, et al. Resident and early-career family physicians' focused practice choices in Canada: a qualitative study. *Br J Gen Pract*. 2022;72(718):e334-e341. doi:10.3399/BJGP.2021.0512
17. Fortune FS Erika Fry. Death By 1,000 Clicks: Where Electronic Health Records Went Wrong. Kaiser Health News. Published March 18, 2019. Accessed June 17, 2022. <https://khn.org/news/death-by-a-thousand-clicks/>
18. Starfield B. The hidden inequity in health care. *International Journal for Equity in Health*. 2011;10(1):15. doi:10.1186/1475-9276-10-15
19. McKay M. The future of family medicine: Nova Scotia family physicians' visions and priorities. Final research report. Doctors Nova Scotia;2023.
20. Office of Regulatory Affairs and Service Effectiveness. *Physician Administrative Burden Survey – Final Report*. Government of Nova Scotia; 2020. Accessed August 18, 2022. <https://doctorsns.com/sites/default/files/2020-11/admin-burden-survey-results.pdf>
21. Alegbeh A. Patients before paperwork. Nova Scotia's approach to improving patient care by reducing physician red tape. Canadian Federation of Independent Business; 2023. Accessed March 31, 2023. <https://www.cfib-fcei.ca/en/research-economic-analysis/patients-before-paperwork-nova-scotias-approach-to-improving-patient-care-by-reducing-physician-red-tape>  
[https://20336445.fs1.hubspotusercontent-na1.net/hubfs/20336445/research/reports/2023/Patients\\_Before\\_Paperwork\\_Report\\_2023.pdf](https://20336445.fs1.hubspotusercontent-na1.net/hubfs/20336445/research/reports/2023/Patients_Before_Paperwork_Report_2023.pdf)
22. CBC News. Fredericton family doctor calls on province to help cut paperwork, free up time for patients. <https://www.cbc.ca/news/canada/new-brunswick/family-doctors-paperwork-new-brunswick-will-stymiest-medical-society-1.6734457>
23. Apaydin E. Administrative work and job role beliefs in primary care physicians: An analysis of semi-structured interviews. *SAGE Open*. 2020;10(1):2158244019899092. doi:10.1177/2158244019899092
24. WHO Collaborating Centre for Drug Statistics Methodology: International language for drug utilization research. Accessed April 10, 2023. <https://www.whocc.no>

- 1
  - 2
  - 3
  - 4
  - 5
  - 6
  - 7
  - 8
  - 9
  - 10
  - 11
  - 12
  - 13
  - 14
  - 15
  - 16
  - 17
  - 18
  - 19
  - 20
  - 21
  - 22
  - 23
  - 24
  - 25
  - 26
  - 27
  - 28
  - 29
  - 30
  - 31
  - 32
  - 33
  - 34
  - 35
  - 36
  - 37
  - 38
  - 39
  - 40
  - 41
  - 42
  - 43
  - 44
  - 45
  - 46
  - 47
  - 48
  - 49
  - 50
  - 51
  - 52
  - 53
  - 54
  - 55
  - 56
  - 57
  - 58
  - 59
  - 60
25. Archibald MM, Ambagtsheer RC, Casey MG, Lawless M. Using zoom videoconferencing for qualitative data collection: Perceptions and experiences of researchers and participants. *International Journal of Qualitative Methods*. 2019;18:1609406919874596. doi:10.1177/1609406919874596
26. Gruber M, Eberl JM, Lind F, Boomgaarden HG. Qualitative Interviews with irregular migrants in times of COVID-19: Recourse to remote interview techniques as a possible methodological adjustment. *Forum Qualitative Sozialforschung / Forum: Qualitative Social Research*. 2021;22(1). doi:10.17169/fqs-22.1.3563
27. Sandelowski M. Sample size in qualitative research. *Research in Nursing & Health*. 1995;18(2):179-183. doi:10.1002/nur.4770180211
28. Morse JM. Analytic Strategies and Sample Size. *Qualitative Health Research*. 2015;25(10):1317-1318. doi:10.1177/1049732315602867
29. Morse JM. Designing funded qualitative research. In: *Handbook of Qualitative Research*. Sage Publications, Inc; 1994:220-235.
30. Lavergne MR, Goldsmith LJ, Grudniewicz A, et al. Practice patterns among early-career primary care (ECPC) physicians and workforce planning implications: protocol for a mixed methods study. *BMJ Open*. 2019;9(9):e030477. doi:10.1136/bmjopen-2019-030477
31. Hedden L. *Beyond Full-Time Equivalents: Gender Differences in Activity and Practice Patterns for BC's Primary Care Physicians*. PhD Thesis. University of British Columbia; 2015.
32. Buddeberg-Fischer B, Stamm M, Buddeberg C, et al. The impact of gender and parenthood on physicians' careers - professional and personal situation seven years after graduation. *BMC Health Services Research*. 2010;10(1):40. doi:10.1186/1472-6963-10-40
33. Jolly S, Griffith KA, DeCastro R, Stewart A, Ubel P, Jaggi R. Gender differences in time spent on parenting and domestic responsibilities by high-achieving young physician-researchers. *Annals of internal medicine*. 2014;160(5):344-353. doi:10.7326/M13-0974
34. Canadian Institute for Health Information. 2022. <https://www.cihi.ca/en/nurse-practitioners>
35. Braun V, Clarke V. *Thematic Analysis: A Practical Guide*. Sage Publications Ltd; 2021.
36. Flick U. Challenges for a New Critical Qualitative Inquiry: Introduction to the Special Issue. *Qualitative Inquiry*. 2017;23(1):3-7. doi:10.1177/1077800416655829
37. Denzin NK. Critical Qualitative Inquiry. *Qualitative Inquiry*. 2017;12(1). doi:doi.org/10.1177/1077800416681864
38. Al-Amoudi I, Willmott H. Where constructionism and critical realism converge: Interrogating the domain of epistemological relativism. *Organization Studies*. 2011;32(1):27-46. doi:10.1177/0170840610394293

- 1  
2  
3  
4  
5  
6  
7  
8  
9  
10  
11  
12  
13  
14  
15  
16  
17  
18  
19  
20  
21  
22  
23  
24  
25  
26  
27  
28  
29  
30  
31  
32  
33  
34  
35  
36  
37  
38  
39  
40  
41  
42  
43  
44  
45  
46  
47  
48  
49  
50  
51  
52  
53  
54  
55  
56  
57  
58  
59  
60
39. Burr V. *Social Constructionism*. 3rd ed. Routledge; 2015. Accessed August 18, 2022. <https://www.routledge.com/Social-Constructionism/Burr/p/book/9781848721920>
  40. Boyko JA, Lavis JN, Abelson J, Dobbins M, Carter N. Deliberative dialogues as a mechanism for knowledge translation and exchange in health systems decision-making. *Social Science & Medicine*. 2012;75(11):1938-1945. doi:10.1016/j.socscimed.2012.06.016
  41. Harvey N, Holmes CA. Nominal Group Technique: An effective method for obtaining group consensus. *International Journal of Nursing Practice*. 2012;18(2):188-194.
  42. Potter M, Gordon S, Hamer P. The Nominal Group Technique: a useful consensus methodology in physiotherapy research. *New Zealand Journal of Physiotherapy*. 2004;3(2):70-74.
  43. Guerra CE, McDonald VJ, Ravenell KL, Asch DA, Shea JA. Effect of race on patient expectations regarding their primary care physicians. *Family Practice*. 2007;25(1):49-55. doi:10.1093/fampra/cmn005
  44. Hedden, L., Barer, ML, Cardiff, K, McGrail, KM, Law, MR, Bourgeault, IL. The implications of the feminization of the primary care physician workforce on service supply: a systematic review. *Human Resources Health*. 2014;12:32. <http://www.human-resources-health.com/content/12/1/32>
  45. Bowen S, Graham I. Integrated knowledge translation. In: *Knowledge Translation in Health Care*. John Wiley & Sons, Ltd; 2013:14-23.

# BMJ Open

## Understanding and addressing changing administrative workload in primary care in Canada: Protocol for a mixed method study

|                                 |                                                                                                                                                                                                                                                                                                                                                                                                                                                                                                                                                                                                                                                                                                                                                                                                                                                                                                                                                                |
|---------------------------------|----------------------------------------------------------------------------------------------------------------------------------------------------------------------------------------------------------------------------------------------------------------------------------------------------------------------------------------------------------------------------------------------------------------------------------------------------------------------------------------------------------------------------------------------------------------------------------------------------------------------------------------------------------------------------------------------------------------------------------------------------------------------------------------------------------------------------------------------------------------------------------------------------------------------------------------------------------------|
| Journal:                        | <i>BMJ Open</i>                                                                                                                                                                                                                                                                                                                                                                                                                                                                                                                                                                                                                                                                                                                                                                                                                                                                                                                                                |
| Manuscript ID                   | bmjopen-2023-076917.R1                                                                                                                                                                                                                                                                                                                                                                                                                                                                                                                                                                                                                                                                                                                                                                                                                                                                                                                                         |
| Article Type:                   | Protocol                                                                                                                                                                                                                                                                                                                                                                                                                                                                                                                                                                                                                                                                                                                                                                                                                                                                                                                                                       |
| Date Submitted by the Author:   | 30-Oct-2023                                                                                                                                                                                                                                                                                                                                                                                                                                                                                                                                                                                                                                                                                                                                                                                                                                                                                                                                                    |
| Complete List of Authors:       | Lavergne, M.; Dalhousie University Faculty of Medicine, Department of Family Medicine; Simon Fraser University<br>Moravac, Catherine; Dalhousie University Faculty of Medicine, Family Medicine<br>Bergin, Fiona; Dalhousie University Faculty of Medicine, Practice Ready Assessment Program<br>Buote, Richard; College of Family Physicians of Canada<br>Easley, Julie; Horizon Health Network, Family Medicine<br>Grudniewicz, Agnes; University of Ottawa, Telfer School of Management<br>Hedden, Lindsay ; Simon Fraser University,<br>Leslie, Myles; University of Calgary,<br>McKay, Madeleine; Doctors Nova Scotia<br>Marshall, Emily; Dalhousie University, Family Medicine<br>Martin-Misener, Ruth; Dalhousie University,<br>Mooney, Melanie; Nova Scotia Health Authority, Primary Health Care and Chronic Disease Management<br>Palmer, Erin; Dalhousie University Faculty of Medicine<br>Tracey, Joshua; Dalhousie University Faculty of Medicine |
| <b>Primary Subject Heading</b>: | General practice / Family practice                                                                                                                                                                                                                                                                                                                                                                                                                                                                                                                                                                                                                                                                                                                                                                                                                                                                                                                             |
| Secondary Subject Heading:      | Health services research                                                                                                                                                                                                                                                                                                                                                                                                                                                                                                                                                                                                                                                                                                                                                                                                                                                                                                                                       |
| Keywords:                       | Primary Care < Primary Health Care, HEALTH SERVICES ADMINISTRATION & MANAGEMENT, Organisation of health services < HEALTH SERVICES ADMINISTRATION & MANAGEMENT, Human resource management < HEALTH SERVICES ADMINISTRATION & MANAGEMENT                                                                                                                                                                                                                                                                                                                                                                                                                                                                                                                                                                                                                                                                                                                        |
|                                 |                                                                                                                                                                                                                                                                                                                                                                                                                                                                                                                                                                                                                                                                                                                                                                                                                                                                                                                                                                |

SCHOLARONE™  
Manuscripts

1  
2  
3  
4  
5 **Understanding and addressing changing administrative workload in primary**  
6 **care in Canada: Protocol for a mixed method study**  
7  
8  
9

10 Author: Ruth Lavergne

11  
12 Co-Authors:  
13 Catherine Moravac  
14 Fiona Bergin  
15 Richard Buote  
16 Julie Easley  
17 Agnes Grudniewicz  
18 Lindsay Hedden  
19 Myles Leslie  
20 Madeleine McKay  
21 Emily Gard Marshall  
22 Ruth Martin-Misener  
23 Melanie Mooney  
24 Erin Palmer  
25 Joshua Tracey  
26  
27  
28  
29

30 Corresponding Author: Dr. Ruth Lavergne  
31 Tier II Canada Research Chair in Primary Care  
32 Associate Professor  
33 Primary Care Research Unit  
34 Department of Family Medicine  
35 Dalhousie University  
36 1465 Brenton Street, Suite 402  
37 Halifax Nova Scotia  
38 B3J 3T4  
39 CANADA  
40  
41  
42

43 [Ruth.lavergne@dal.ca](mailto:Ruth.lavergne@dal.ca)  
44 Phone: 1-902-473-4741  
45 Fax: 1-902-473-4760  
46  
47  
48  
49

50 Co-Authors:  
51 Catherine Moravac  
52 Dalhousie University  
53 Halifax, Nova Scotia  
54 CANADA  
55  
56

1  
2  
3 Fiona Bergin  
4 Dalhousie University  
5 Halifax, Nova Scotia  
6 CANADA  
7  
8  
9

10  
11  
12  
13 Richard Buote  
14 College of Family Physicians of Canada  
15 Mississauga, Ontario  
16 CANADA  
17  
18

19 Julie Easley  
20 Horizon Health Network  
21 Fredericton, New Brunswick  
22 CANADA  
23  
24

25 Agnes Grudniewicz  
26 Telfer School of Management  
27 University of Ottawa  
28 Ottawa, Ontario  
29 CANADA  
30  
31

32 Lindsay Hedden  
33 Simon Fraser University  
34 Burnaby, British Columbia  
35 CANADA  
36  
37

38 Myles Leslie  
39 University of Calgary  
40 Calgary, Alberta  
41 CANADA  
42  
43

44 Madeleine McKay  
45 Doctors Nova Scotia  
46 Dartmouth, Nova Scotia  
47 CANADA  
48  
49

50 Emily Gard Marshall  
51 Dalhousie University  
52 Halifax, Nova Scotia  
53 CANADA  
54  
55

56  
57  
58  
59  
60

1  
2  
3  
4  
5  
6  
7  
8  
9  
10  
11  
12  
13  
14  
15  
16  
17  
18  
19  
20  
21  
22  
23  
24  
25  
26  
27  
28  
29  
30  
31  
32  
33  
34  
35  
36  
37  
38  
39  
40  
41  
42  
43  
44  
45  
46  
47  
48  
49  
50  
51  
52  
53  
54  
55  
56  
57  
58  
59  
60

Ruth Martin-Misener  
Dalhousie University  
Halifax, Nova Scotia  
CANADA

Melanie Mooney  
Nova Scotia Health Authority  
Yarmouth, Nova Scotia  
CANADA

Erin Palmer  
Dalhousie University  
St. John, New Brunswick  
CANADA

Joshua Tracey  
Dalhousie University  
St. John, New Brunswick  
Nova Scotia  
CANADA

Key Words: Primary Health Care  
Health Services Administration and Management  
Organization of Health Services  
Administrative Workload

Word Count: 4,388 (excluding title page, abstract, strengths & limitations, flow chart and references)



# Understanding and addressing changing administrative workload in primary care in Canada: Protocol for a mixed method study

## Abstract

### *Introduction*

Many Canadians struggle to access the primary care they need while at the same time primary care providers report record levels of stress and overwork. There is an urgent need to understand factors contributing to the gap between a growing per-capita supply of primary care providers and declines in the availability of primary care services. The assumption of responsibility by primary care teams for services previously delivered on an in-patient basis, along with a rise in administrative responsibilities may be factors influencing reduced access to care.

### *Methods and Analysis*

In this mixed methods study our first objective is to determine how the volume of services requiring primary care coordination has changed over time in the Canadian provinces of Nova Scotia and New Brunswick. We will collect quantitative administrative data to investigate how services have shifted in ways that may impact administrative workload in primary care. Our second objective is to use qualitative interviews with family physicians, nurse practitioners, and administrative team members providing primary care to understand how administrative workload has changed over time. We will then identify priority issues and practical response strategies using two deliberative dialogue events convened with primary care providers, clinical and system leaders, and policymakers.

We will analyze changes in service use data between 2001/2 and 2021/22 using annual total counts, rates per capita, rates per primary care provider, and per primary care service. We will conduct reflexive thematic analysis to develop themes and to compare and contrast participant responses reflecting differences across disciplines, payment and practice models, and practice settings. Areas of concern and potential solutions raised during interviews will inform deliberative dialogue events.

### *Ethics and Dissemination*

We received research ethics approval from Nova Scotia Health (#1028815). Knowledge translation will occur through dialogue events, academic papers, and presentations at national and international conferences.

## Strengths & Limitations

- Administrative work may play a substantial role in understanding changing primary care workload and is receiving policy attention, but has not been carefully studied.
- This study will involve both quantitative and qualitative data complemented by deliberative dialogue events for robust description, analysis, and actionable recommendations.
- Trustworthiness of qualitative methods and analysis will be demonstrated through inclusion of three professional groups working in two provinces, the positionality and reflexivity of diverse research team members, the use of constant comparison throughout concurrent data collection, thick description, and an audit trail.
- A population-level analysis of factors shaping changing workload will inform trends for system-wide planning, but won't provide detailed clinician-level information

## Introduction

There are more primary care providers per person than ever before in Canada(1). At the same time, primary care is described as being in crisis,(2-4) as Canadians struggle to access needed care(5) and primary care providers report record levels of stress and overwork.(6) There is an urgent need to understand factors contributing to the gap between a growing number of primary care providers per person and declines in the availability of primary care services.(7) To some extent this gap may reflect declining hours worked(8) or service volume(9) per physician, but evidence also points to broader health system changes that may impact workload in primary care(10) over and above visit volume. Neither the extent of these changes, nor their impact on provider experience and patient access have been carefully studied.(6)

Beyond patient visits, primary care providers (including family physicians (FPs) and nurse practitioners (NPs)) are responsible for indirect patient care activities such as arranging prescriptions, lab tests, imaging, specialist referrals, and medical forms, as well as maintaining a longitudinal patient record.(11) Over the past 20 years we have seen a shift in care from hospitals to communities,(12) a proliferation of guidelines and increased complexity in the management of common chronic conditions,(13-16) and accelerating population aging.(17, 12, 18) The intersecting effects of these trends may mean that there is greater need than ever for care coordination or indirect patient care, contributing to expanding administrative workload in primary care. Navigating electronic medical records, complicated referral processes, and cumbersome forms, may be increasing the time needed to complete indirect patient related tasks. Patients may be referred by primary care providers to programs or specialists as part of the overall care plan. These referrals, however, often result in additional administrative work

1  
2  
3 and record-keeping responsibilities. Paperwork and tasks flow back to primary care from  
4 referral sources, further increasing workload. In addition to administrative responsibilities  
5 related to care coordination, primary care providers play varied roles in clinic administration,  
6 depending on service delivery model.  
7  
8

9 Administrative workload has been described as a source of burnout and reduced access to care  
10 for patients, and may push family physicians to choose options other than comprehensive  
11 community-based practice.(19) This has been casually called “death by a thousand papercuts”  
12 or more recently “death by a thousand clicks.”(20) Under this view, time spent on a variety of  
13 administrative tasks is secondary to the ‘real’ work of primary care. Indeed administration has  
14 been broadly characterized as taking away from other patient care activities, thereby making  
15 health systems less efficient and also less equitable, as people who most need coordinated care  
16 may struggle to access it.(10, 21) At the same time, administrative work is central to delivering  
17 coordinated and integrated care to patients and to clinic operations.  
18  
19  
20

21 Outcomes of a survey conducted by Doctors Nova Scotia published in December 2021 revealed  
22 that administrative burdens were included among the top three challenges facing primary care  
23 physicians in that province.(22) The magnitude of this problem led to the involvement of the  
24 Office of Regulatory Affairs and Service Effectiveness (ORASE) of the Nova Scotia government to  
25 investigate and implement concrete action plans to address unnecessary administrative  
26 burdens on physicians.(23) With the support of Doctors Nova Scotia, a survey administered by  
27 ORASE found that 38% of physicians’ time was spent on unnecessary administrative tasks, and  
28 that 24% of that work could have been done by someone in a different role/profession.(23) The  
29 survey also found that physicians believed that 14% of that work could be entirely  
30 eliminated(23) The report on the survey noted that the main contributors to unnecessary  
31 administrative tasks were: the completion of medical forms, doctor’s notes, business  
32 operations, billing, including shadow billing, licensing, privileging, and tasks associated with  
33 requirements of government and oversight entities. Importantly, physicians indicated that  
34 administrative burdens significantly contributed to burnout, and that reductions of time spent  
35 on these tasks would allow time for improved work/life balance and improved patient  
36 care.(23) While administrative burden is a problem for all acute, specialist, and primary care  
37 physicians in Nova Scotia, given the unique role primary care physicians play in coordinating  
38 care, we need detailed information about, and solutions for, this setting.  
39  
40  
41  
42  
43  
44

45 The impact of administrative burdens in primary care are complex. It is not simply a problem of  
46 too much paperwork. Family physicians and nurse practitioners are also increasingly  
47 responding to issues related to patients’ social determinants of health without adequate  
48 support and resources, often resulting in frustration, stress, and emotional burden.(23) Wait  
49 times for specialist referrals translate to lengthier periods of patient management, additional  
50 paperwork, follow-up on referrals, and carrying the emotional burden of patients’ unmet  
51 needs. Added to these pressures are expectations to take on more ‘unattached’ patients, while  
52 not having the time or capacity to do so because of the complexity of care required by existing  
53 patients coupled with heavy administrative burdens. While the emotional toll of administrative  
54  
55  
56  
57

burden on primary care providers is not the focus of this study, it is important to recognize that there are many concerning ripple effects that accompany this problem.

A 2023 study(24) built on the findings of the ORASE's Physician Administrative Burden Survey conducted in Nova Scotia. Study outcomes demonstrated that a 10% reduction of unnecessary paperwork for primary care physicians in New Brunswick would equal an additional 119,726 patient visits annually.(25) While increased recognition of this problem and attempts to address it are welcome, it comes with an implicit expectation that primary care providers will have the capacity to see new patients and/or increase the number of visits for existing patients. This expectation may add to primary care provider stress and emotional burden.

While there is some limited qualitative research with primary care physicians in the United States,(26) none yet exists in Canada. We also need information drawing on the experience and expertise of nurse practitioners, clinic managers, medical office assistants, and other primary care team members with administrative responsibilities. New information to understand the extent and drivers of administrative workload, as well as the strategies required to make this activity more efficient are urgently needed.

### Study Objectives

This project will address three objectives and nested research questions, with the overarching goal of adjusting administrative workload, while ensuring efficient, accountable, and well-coordinated care:

1. Determine how the volume of services requiring primary care coordination has changed over time
  - a. How has service volume shifted from inpatient services to outpatient and community-based services requiring coordination through primary care?
  - b. How has the volume of outpatient services requiring primary care coordination and oversight (i.e., prescriptions, testing, imaging, and specialist consultations) changed over time?
2. Use interviews with primary care providers (family physicians and nurse practitioners) and administrative team members to understand how administrative workload has changed:
  - a. What are current experiences of administrative workload, including work related to patient care and clinic administration?
  - b. How has administrative workload changed over time? What factors have shaped changes?
  - c. What are areas of particular concern and how might these be addressed?
3. Drawing on the findings of Objectives 1 and 2, with primary care providers and service planners, co-identify priority issues and co-develop practical response strategies to make administrative work more efficient:
  - a. Which areas of concern are addressable in the short, medium and long term?

1  
2  
3 b. What actions would be needed, who is in a position to act, and what resources would  
4 be involved?  
5  
6  
7  
8  
9  
10  
11  
12  
13  
14  
15  
16  
17  
18  
19  
20  
21  
22  
23  
24  
25  
26  
27  
28  
29  
30  
31  
32  
33  
34  
35  
36  
37  
38  
39  
40  
41  
42  
43  
44  
45  
46  
47  
48  
49  
50  
51  
52  
53  
54  
55  
56  
57  
58  
59  
60

For peer review only

## Methods

This two-year study (June 2023 - May 2025) will use different data sources and methodologies to address each project objective within two study provinces, Nova Scotia and New Brunswick (Figure 1). Findings of descriptive quantitative analysis under Objective 1 and in-depth qualitative interviews under Objective 2 will inform deliberative dialogues used to address Objective 3.

### *Objective 1 - Quantitative administrative data*

To address Objective 1 we will seek out and combine administrative data from multiple sources to create a more complete picture of shifts in service use over time, accessing data from 2001/2 (or earliest available, depending on dataset) and 2023/2024 (or most recent available). This time frame will allow us to explore long-term trends, as well as changes since March 2020 due to the pandemic. We do not need access to individual, record-level data to meet study objectives and plan only population-level analysis, using population-based data that captures service delivery for all insured residents of the study provinces (approximately 1 million residents in NS and 800,000 in NB). To address question 1a we will combine publicly-available data accessible through the Canadian Institutes of Health Information at the provincial level to examine trends in hospital services use as well as services delivered on an outpatient basis or in the community. To examine trends in hospitalizations, we will count the number of discharges recorded in the Discharge Abstract Database (DAD) and the number of days patients spent in hospital.(27) The DAD captures administrative, clinical, and demographic information on all hospital discharges (including deaths, sign-outs and transfers). To capture outpatient physician service use, we will use the National Physician Database (NPD) to track number of visits with primary care physicians, as well as with medical specialists and surgical specialists. The NPD contains information on both the demographic characteristics, and their payments and activities within the health care system. We will use the DAD to count the number of day surgery procedures. Finally, we will use the National Health Expenditures Database to triangulate findings about service volume, examining shifts in spending between hospitals and other categories of healthcare over time(28).

To address question 1b we will track total laboratory tests and imaging services completed for outpatients, as FP/NPs have a role in reviewing and coordinating these even when ordered by other physicians. Public prescription data for seniors will be used to count the number of different drugs dispensed per year, at the level of the first 5 digits of the Anatomical Therapeutic Chemical classification (ATC) code.(29) We will exclude vaccines (J07), vitamins (A11), mineral supplements (A12), tonics (A13) and various (V) categories. As with lab tests, as FP/NPs have a role in managing all prescriptions, we will report the total. We will use NPD to track specialist physician visit data, focusing on those seen as outpatients, as, as reports would go back to NPs/FPs for patient follow-up.

*Quantitative Analysis:* Our approach is primarily descriptive and it is not necessary to link datasets at the individual level. We will present service use data as annual total counts (to

1  
2  
3 capture how total workload has changed), as rates per capita (to capture how patient-level care  
4 has changed), as well as rates per primary care provider, and per primary care service (to  
5 capture how changes in workload map onto primary care workforce supply and practice  
6 volume). Following visual inspection of trends over time, we will use segmented regression to  
7 quantify changes in level or trend of service use over time, including in the context of the  
8 COVID-19 pandemic.(30)  
9  
10

### 11 *Objective 2 - In-depth video interviews*

12  
13

14 Our approach most closely resembles a mixed methods multi-level plan in which  
15 quantitative and qualitative data will be concurrently collected and analyzed, each with  
16 equal weight. The research questions we are attempting to answer through the use and  
17 analysis of quantitative data while complementary, are distinct from the research questions  
18 we are exploring through qualitative interviews and analysis. Findings from both methods  
19 will contribute to knowledge generation and may enhance each other, however it is  
20 impossible to know in advance of data collection and analysis precisely how this will evolve.  
21 We anticipate that findings from quantitative data on changes in service volume requiring  
22 primary care coordination will be better understood when complemented by narratives from  
23 the interviews that add important contextual information  
24  
25  
26  
27

28 *Interviews:* We will use interviews with primary care providers (FPs, NPs, and other team  
29 members involved in administration (clinic managers and/or medical office assistants) to  
30 understand their current administrative workload (including care coordination and other  
31 administrative activities), how this has changed over time, and what opportunities exist to  
32 manage this differently. See supplementary material for interview guides. We will be  
33 interviewing primary care providers and administrative staff in New Brunswick as well as Nova  
34 Scotia to compare narratives between the two provinces, and to inform a planned Pan-  
35 Canadian study on this topic in the future.  
36  
37  
38

39 We will conduct interviews via a secure online video platform. Interviews will last  
40 approximately one hour and will be scheduled at a time that is convenient and acceptable to  
41 study participants. This will allow us to reach a geographically varied set of participants at a  
42 lower cost than conducting in-person interviews. Video interviews have been shown to produce  
43 similar data richness when compared with in-person interviews.(31,32) Interviews will be  
44 conducted by Master's or PhD trained qualitative research staff. Interview data will be digitally  
45 recorded, professionally transcribed, quality checked for accuracy, and de-identified prior to  
46 analysis. Each interviewer will complete field notes shortly after interviews take place. Field  
47 notes will be reviewed prior to and during analysis. The research associate will document all  
48 analytic decisions for the audit trail.  
49  
50  
51  
52

53 *Recruitment:* We will purposively recruit primary care providers who are funded through a  
54 range of payment models (fee-for-service and alternate payment plans), who work in a range of  
55  
56

1  
2  
3 clinic models (independent, health authority partnered, turn-key health authority operated),  
4 and who work in a range of geographic locations (urban and rural locations throughout each  
5 province). Specifically, we will recruit from Nova Scotia Health Primary Care Clinics, Dalhousie  
6 Family Medicine teaching sites, Doctors Nova Scotia, and Nurse Practitioners of New  
7 Brunswick. Potential participants will complete a brief on-line screening survey (see  
8 supplementary information.) We plan sample sizes of 20 FP/NP and 20 administrative team  
9 member interviews to investigate differences by models and locations. The total sample size is  
10 forty. This sample size is consistent with recommendations for similar study designs.(33-35)  
11 Previous research we conducted concerning primary care practice was received with strong  
12 interest;(36) we anticipate similarly strong interest in this topic.  
13  
14  
15

16 The project research associate will contact key individuals at recruitment organizations to  
17 explain the study and coordinate outreach. Key individuals at each site will distribute  
18 introductory emails along with a study poster. There will be a link from the poster to the  
19 screening survey. Our aim is to interview participants from various geographical settings,  
20 practice types, remuneration models, discipline (nurse practitioner, family physician,  
21 administration) and with varying lengths of practice experience and roles in primary care clinic  
22 settings. Sampling from the results of the screening survey will involve selection of interview  
23 participants with the greatest number of diverse characteristics. Sampling will depend on the  
24 number and diversity of survey responses. Additional recruitment will take place until sampling  
25 goals have been reached.  
26  
27  
28

29 Gender is of central importance in this project. A substantial body of evidence shows that  
30 physician practice patterns are gendered, as are expectations with respect to care provision,  
31 including potentially administrative workload.(37-39) We will be attentive to gender in both  
32 interview recruitment and qualitative analysis. As an increasing proportion of family physicians  
33 are women, and 92% of nurse practitioners in Canada(40) are female we will actively recruit  
34 men and ensure there are no barriers to participation for people with other genders. We will  
35 ask participants about how they perceive relationships between gender and administrative  
36 workload, and our analysis will explore how responses and experiences vary by gender.  
37  
38  
39

40 Informed Consent. Consent is implied by completion of the online survey. This is clearly  
41 articulated in the introductory text to the survey, and has been approved by the local research  
42 ethics board. Potential participants selected for interviews will be contacted by the research  
43 associate. A participant information sheet covering all the topics typically included in consent  
44 forms will be provided at that time, and participants will have an opportunity to ask any  
45 questions they have before interviews are scheduled. At the beginning of each interview the  
46 research associate will review study aims, participant rights, and obtain verbal consent. The  
47 consent process will be audiotaped for documentation purposes.  
48  
49  
50

51 Each participant will be assigned an identification number in place of their name. All interview  
52 transcripts will bear the identification number. Participant quotes will be included in  
53 presentations and publications emanating from this study, however there will not be any  
54 personal identifiers. Quotes will be attributed to the type of professional, gender and province  
55  
56  
57



1  
2  
3 in which the person is practicing, with attention to any contextual details of practice that could  
4 be identifying.  
5  
6

7  
8 *Data Management:* Quantitative and qualitative data and consent forms will be securely stored  
9 on encrypted password-protected computers. Files are backed up monthly on an external drive.  
10 Both quantitative and qualitative data will be stored for a period of seven years after which it  
11 will be permanently destroyed in accordance with the policies of Dalhousie University.  
12

13  
14 *Qualitative Analysis:* We will employ Braun and Clarke's reflexive thematic analysis(41) which  
15 fits well with our critical qualitative approach(42-43) and relativist epistemology.(44) Our  
16 analysis will also be guided by social constructionism.(45) This blended approach reflects our  
17 positionality as active participants in the research process, our understanding that meaning is  
18 socially constructed, and the key role of reflexivity throughout the research process. There are  
19 six fluid phases involved when conducting reflexive thematic analysis. The first phase is  
20 becoming familiar with the interview data by reading through transcripts on several occasions.  
21 The next phase involves initial coding of data related to the research question. We plan to  
22 employ an inductive approach to analysis at that stage. This will be followed by the generation  
23 of preliminary themes. We will then return to the data, further develop and revise themes.  
24 Depending on the analysis in progress, we may continue with the inductive analysis, or we may  
25 decide to conduct a deductive analysis based on a concept or framework that we determine at  
26 that point may provide greater depth to the findings. In the latter case, we will return to the  
27 data and commence a new phase of coding deductively. This is what is meant by the fluidity of  
28 analytic phases. Once that phase has been completed, we will further refine and name themes  
29 and develop definitions for the themes. The final stage involves written preparation of the  
30 results including a discussion of their relevance to the existing literature.  
31  
32  
33  
34  
35

36 Initially each member of the qualitative working group will review 2-3 transcripts each. Working  
37 group members will meet weekly to discuss the transcripts and potential codes. The research  
38 associate will use NVivo software to begin the inductive coding process based on those  
39 discussions. We will begin by generating a detailed description of administrative workload  
40 (research question 2a). Analysis will occur concurrently with data collection and the interview  
41 guide will be iteratively adjusted if needed as our understanding of experiences of  
42 administrative workload develops. We will then expand analysis to explore changes over time  
43 (question 2b), and to make comparisons between FP/NP and administrative team member  
44 interviews, as well as to explore variation across payment model, practice model, and practice  
45 setting. To address research question 2c, and in preparation for Objective 3, we will group and  
46 compile areas of concern and potential solutions raised by participants.  
47  
48  
49  
50

51 The qualitative working group will continue to meet bi-weekly or as needed throughout the  
52 analytic process. The diverse perspectives and expertise of group members will ensure a robust  
53 and meticulous analysis of qualitative data. We will have representation from family medicine,  
54 nursing, health administration and health policy, as well as expertise in qualitative research  
55  
56

1  
2  
3 methods, ethnography and medical anthropology. Each interviewer will prepare field notes  
4 shortly after interviews take place. This may result in modifications to the interview guides.  
5 Field notes will be reviewed prior to and during analysis. The research associate will document  
6 all analytic decisions as part of the audit trail.  
7  
8  
9

10 Time Frame: We expect the recruitment period and interviews to begin in September and be  
11 complete by the end December 2023. Qualitative analysis will also commence in September  
12 2023 and is expected to continue through to June 2024.  
13  
14  
15

### 16 *Objective 3 - Integration of findings and knowledge exchange*

17

18 We will work with partners on the team to identify relevant participants for a final two-phase  
19 dialogue event, designed to integrate and interpret both scientific and contextual data for the  
20 purpose of informing policy development,(46) in this case, strategies to address administrative  
21 workload. We will include 1) a subset of interview participants (primary care providers and  
22 administrative team members) working in varied contexts, 2) clinical leaders who can make  
23 changes within primary care service delivery environments, and 3) system administrators and  
24 policymaker leaders who can change processes that involve both primary care and other parts  
25 of the health system or sectors.  
26  
27  
28

29 Prior to the first meeting, the study team will review quantitative findings and the initial list of  
30 areas of concern identified through qualitative interviews. These will be integrated into a  
31 background document circulated in advance of the dialogue process. Quantitative findings will  
32 inform changing administrative workload over time, and qualitative findings will provide  
33 context for areas of concern and potential solutions that will be explored during dialogue  
34 events. Dialogues will be conducted via video-conference in two stages. In the first stage,  
35 Nominal Group Technique (NGT)(47-48) will be used to guide discussion and prioritization of  
36 issues and solutions. Nominal Group Technique has been used since the 1960s for the  
37 identification of problems, priority ranking of issues, action items, or questions in small group  
38 in-person sessions. One of the technique's key strengths is it is designed for equal  
39 representation among participants and is non-hierarchical in nature. In this study, areas of  
40 concern generated and recorded in qualitative interviews will serve as a starting point for  
41 discussion, with participants invited to add topics not yet mentioned. In a ranking exercise,  
42 participants will be invited to consider which tasks are time consuming and/or offer lower value  
43 to patients and the system. Then participants will be asked to discuss and explain the reasons  
44 for their ranking.  
45  
46  
47  
48  
49

50 The second stage will focus on feasibility and actions needed to address high-priority areas of  
51 concern identified in the first event. Prior to the second stage, we will identify any additional  
52 participants with knowledge specific to areas of concern. Participants will be asked to consider  
53 which could be addressable in the short term (<3 months), medium term (3-12 months), and  
54 long term (one year or more). In breakout groups focusing on individual areas of concern,  
55  
56  
57

1  
2  
3 participants will be asked to consider what action would be needed and who would need to be  
4 involved. Each breakout group will be led by a facilitator briefed and prepared by the research  
5 team. After the breakout group discussions, there will be a debriefing with the full group of  
6 participants. The dialogue process will provide concrete and actionable strategies tailored to  
7 the primary care setting, that complement other ongoing work within Nova Scotia and New  
8 Brunswick health systems.  
9  
10

### 11 **Impact on equity in recruitment and retention of healthcare professionals**

12  
13 Administrative workload directly impacts recruitment and retention of healthcare  
14 professionals, at times influencing family physicians to choose options other than community-  
15 based primary care as a strategy to circumvent burnout.(19) Expectations for coordination may  
16 vary by how primary care providers are gendered and racialized (49) ; women form a growing  
17 proportion of the primary care workforce.(50) Addressing coordination workload can therefore  
18 play a role in supporting equity in recruitment and retention of health care professionals.  
19 Understanding and supporting coordination of care is central to people-centred, flexible,  
20 quality healthcare. Identifying practical strategies to make coordination more efficient can  
21 support innovative healthcare models, and more seamless integration of virtual care into  
22 patients' journeys.  
23  
24  
25  
26

### 27 **Patient and Public Involvement**

28  
29 Patients or members of the public were not involved in the design of this study and will not be  
30 involved during implementation. While our research questions respond to topics of patient and  
31 public interest, research approaches focus on routinely collected health system data and  
32 research participants are primary care providers and administrative staff. We therefore focus  
33 on including a range of policy and provider expertise and experience within the research team.  
34 Inclusion of patients in the deliberative dialogue events is not currently planned.  
35  
36  
37

### 38 **Study Limitations**

39  
40 Available quantitative data sources capture variables labeled "sex," but there is no measure of  
41 gender, and administrative or legal sex may not correspond to sex assigned at birth. This is a  
42 limitation of secondary analysis of these data. Where possible, we will distinguish between  
43 patterns plausibly shaped by sex or gender in interpretation.  
44  
45

46 Care coordination activities are not recorded in administrative billing data. It is not possible to  
47 directly capture time spent on care coordination or other administrative work. Instead, we  
48 focus broadly on shifts in care delivery between hospital and community, as well as changes in  
49 services that require coordination, review, and/or administration on the part of primary care  
50 providers. It is beyond the scope and budget of this project to obtain access to linked, record-  
51 level data or to collect detailed time use data. Study objectives can be addressed through  
52 aggregate data that can be shared with no risk of identification. This project will form the  
53 groundwork for a future grant proposal that will use record-level data from the same sources to  
54  
55  
56

1  
2  
3 analyze changes over time by population age and generate projections of future primary care  
4 capacity.  
5

### 6 **Ethics and Dissemination**

7  
8 Research ethics approval for this protocol was received from Nova Scotia Health (REB #  
9 1028815) for research activities in both Nova Scotia and New Brunswick. This study conforms  
10 to the Declaration of Helsinki (June 1962; amended October 2013) and the Belmont Report  
11 (1979).  
12

13  
14 We are taking an integrated knowledge translation approach (51) and have assembled a team  
15 that includes varied perspectives. Primary care provider co-investigators and policy partners  
16 affirm the urgent need to address administrative workload. We will present findings and seek  
17 feedback from the groups represented by partners and team members following completion of  
18 Objectives 1 and 2. Deliberative dialogues under Objective 3 are themselves a method for  
19 knowledge translation, designed to integrate and interpret data to inform strategies addressing  
20 administrative workload. This project will also yield traditional academic outputs crossing  
21 multiple disciplines and results will be disseminated to a range of audiences.  
22  
23

24  
25 Results will inform healthcare delivery excellence that addresses opportunities for team-based  
26 care and the ability of healthcare providers to work to their full scope of practice. New or  
27 expanded roles for administrative and other primary care team members are being piloted in  
28 Nova Scotia. This pilot research will enrich the understanding of our research outcomes and  
29 also support ongoing innovation. Finally, a robust system of primary care is fundamental to  
30 addressing health inequalities in access to care. There is evidence of declining equity in access  
31 to primary care in Canada.<sup>7</sup> Limited primary care capacity and inadequate systems of  
32 coordination impact patients with more complex health and social needs most severely. High-  
33 performing systems of primary care can connect health care with other community resources.  
34 This coordination is needed to support collaborative approaches to address the social  
35 determinants of health.  
36  
37

### 38 **Figure 1. Study overview**

39  
40  
41 4,388 (excluding title page, abstract, strengths & limitations, flow chart and references)  
42  
43

### 44 **Author Affiliations**

45 <sup>1</sup>Department of Family Medicine, Dalhousie University, Nova Scotia, Canada.

46 <sup>2</sup>Horizon Health Network, Fredericton, New Brunswick, Canada.

47 <sup>3</sup>Telfer School of Management, University of Ottawa, Ottawa, Ontario, Canada.

48 <sup>4</sup>Faculty of Health Sciences, Simon Fraser University, Burnaby, British Columbia, Canada.

49 <sup>5</sup>School of Public Policy, University of Calgary, Alberta, Canada.

50 <sup>6</sup>Doctors Nova Scotia, Halifax, Nova Scotia, Canada.

51 <sup>7</sup>School of Nursing, Faculty of Health, Dalhousie University, Nova Scotia, Canada.

52 <sup>8</sup>Nova Scotia Health, Halifax, Nova Scotia, Canada.

53 <sup>9</sup>Department of Family Medicine, Dalhousie University, St. John's, New Brunswick, Canada.  
54  
55  
56

**Author Contributions:**

RL originally conceived the study, wrote the first draft of the Introduction and Objective 1 methods. CM wrote the first draft of Objective 2 methods. FB, RB, JE, AG, LH, ML, MM, EGM, RMM, MM, EP and JT provided feedback for revisions to the interview guides, screening questionnaire, and the draft protocol, and approved the final version for submission.

**Funding:** This study is supported by Research Nova Scotia

**Competing Interests:** None declared

**Patient and public involvement:** There was no patient or public involvement in the development of this protocol. Refer to methods section, page 8.

**Patient consent for publication:** N/A

**Provenance and peer review:** Not commissioned; peer reviewed for ethical and funding approval prior to submission.

**ORCIDiDs**

Ruth Lavergne <http://orcid.org/0000-0002-4205-4600>

Fiona Bergin <http://orcid.org/0009-0001-4503-2933>.

Richard Buote <http://orcid.org/0000-0001-7981-7854>

Julie Easley <http://orcid.org/0000-0002-1711-1343>

Agnes Grudniewicz <http://orcid.org/0000-0003-2960-8178>

Lindsay Hedden <http://orcid.org/0000-0001-9552-1324>

Myles Leslie <http://orcid.org/0000-0001-5759-7993>

Madeleine McKay <http://orcid.org/0009-0003-0652-2678>

Emily Gard Marshall <http://orcid.org/0000-0001-8327-0329>

Ruth Martin-Misener <https://orcid.org/0000-0003-4554-7635>

Melanie Mooney <http://orcid.org/0000-0002-2520-3168>

Catherine Moravac, <http://orcid.org/0000-0002-3000-4980>

Erin Palmer <http://orcid.org/0009-0000-6742-8640>.

Joshua Tracey <http://orcid.org/0009-0009-0559-6273>

## References

1. Canadian Institute for Health Information. *Supply, Distribution and Migration of Physicians in Canada, 2020- Data Tables*. CIHI; 2021.
2. Walsh M, Pearson H. *Nova Scotia Doctor Calls Family Doctor Shortage a "Crisis."* Accessed June 6, 2017. <http://globalnews.ca/news/3270444/nova-scotia-doctor-calls-family-doctor-shortage-a-crisis/>
3. The evolving crisis in primary care. *British Columbia Medical Journal*. Accessed August 16, 2022. <https://bcmj.org/editorials/evolving-crisis-primary-care>
4. Opinion: Canada has a primary-care crisis. Here are three steps we must take to solve this problem. *The Globe and Mail*. <https://www.theglobeandmail.com/opinion/article-canada-has-a-primary-care-crisis-here-are-three-steps-we-must-take-to/>. Published July 16, 2022. Accessed August 16, 2022.
5. Canadian Institute for Health Information. *How Canada Compares: Results from the Commonwealth Fund's 2020 International Health Policy Survey of the General Population in 11 Countries*. CIHI; 2021.
6. Sovran V, Ytsma A, Husak, L, and Johnson, T. Coordination of Care Could Improve: Canadian Results from the Commonwealth Fund International Health Policy Survey of Primary Care Physicians. *Healthcare Quarterly*. 2020;23(2). Accessed March 28, 2022. <https://www.longwoods.com/content/26283/coordination-of-care-could-improve-canadian-results-from-the-commonwealth-fund-international-health>
7. Lavergne MR, Bodner A, Peterson S, et al. Do changes in primary care service use over time differ by neighbourhood income? Population-based longitudinal study in British Columbia, Canada. *Int J Equity Health*. 2022;21(1):80. doi:10.1186/s12939-022-01679-4
8. Islam, R, Kraij, B and Sweetman, A. Physician workforce planning in Canada: the importance of accounting for population aging and changing physician hours of work. *Canadian Medical Association Journal*. 2023;195(9). doi: 10.1503/cmaj.221239
9. Rudlor, D, Peterson, S, Stock, D, et al. Changes over time in patient visits and continuity of care among graduating cohorts of family physicians in four Canadian provinces. *Canadian Medical Association Journal*. 2022;194(48). doi: 10.1503/cmaj.220439
10. Lavergne, R, Peterson S, Rudoler, D, et al. Productivity decline or administrative avalanche? Examining factors that shape changing workloads in primary care. *Healthcare Policy*. 2023;19(1):114-129
11. College of Family Physicians of Canada. *Family Medicine Professional Profile*. College of Family Physicians of Canada; 2018.

12. Chappell N, Hollander M. An Evidence-Based Policy Prescription for An Aging Population. *Healthcare Papers*. 2011;11(1):8-18. doi:10.12927/hcpap.2011.22246
13. Adams WL, McIlvain HE, Lacy NL, et al. Primary care for elderly people: Why do doctors find it so hard? *The Gerontologist*. 2002;42(6):835-842. doi:10.1093/geront/42.6.835
14. Mangin D, Sweeney K, Heath I. Preventive health care in elderly people needs rethinking. *BMJ*. 2007;335(7614):285-287. doi:10.1136/bmj.39241.630741.BE1
15. Korownyk C, McCormack J, Kolber MR, Garrison S, Allan GM. Competing demands and opportunities in primary care. *Canadian Family Physician*. 2017;63(9):664-668.
16. Millar E, Stanley J, Gurney J, et al. Effect of multimorbidity on health service utilisation and health care experiences. *J Prim Health Care*. 2018;10(1):44-53. doi:10.1071/HC17074
17. Barer ML, Evans RG, Hertzman C. Avalanche or glacier?: Health care and the demographic rhetoric. *Canadian Journal on Aging / La Revue canadienne du vieillissement*. 1995;14(2):193-224. doi:10.1017/S0714980800011818
18. Canadian Institute for Health Information. *Health Care in Canada, 2011: A Focus on Seniors and Aging*. Canadian Institute for Health Information; 2012. Accessed April 20, 2022. <https://www.deslibris.ca/ID/230734>
19. Kabir M, Randall E, Mitra G, et al. Resident and early-career family physicians' focused practice choices in Canada: a qualitative study. *Br J Gen Pract*. 2022;72(718):e334-e341. doi:10.3399/BJGP.2021.0512
20. Fortune FS Erika Fry. Death By 1,000 Clicks: Where Electronic Health Records Went Wrong. Kaiser Health News. Published March 18, 2019. Accessed June 17, 2022. <https://khn.org/news/death-by-a-thousand-clicks/>
21. Starfield B. The hidden inequity in health care. *International Journal for Equity in Health*. 2011;10(1):15. doi:10.1186/1475-9276-10-15
22. McKay M. The future of family medicine: Nova Scotia family physicians' visions and priorities. Final research report. Doctors Nova Scotia;2023.
23. Office of Regulatory Affairs and Service Effectiveness. *Physician Administrative Burden Survey – Final Report*. Government of Nova Scotia; 2020. Accessed August 18, 2022. <https://doctorsns.com/sites/default/files/2020-11/admin-burden-survey-results.pdf>
24. Alegbeh A. Patients before paperwork. Nova Scotia's approach to improving patient care by reducing physician red tape. Canadian Federation of Independent Business; 2023. Accessed March 31, 2023. <https://www.cfib-fcei.ca/en/research-economic-analysis/patients-before-paperwork-nova-scotias-approach-to-improving-patient-care-by-reducing-physician-red-tape>  
[https://20336445.fs1.hubspotusercontent-na1.net/hubfs/20336445/research/reports/2023/Patients\\_Before\\_Paperwork\\_Report\\_2023.pdf](https://20336445.fs1.hubspotusercontent-na1.net/hubfs/20336445/research/reports/2023/Patients_Before_Paperwork_Report_2023.pdf)

- 1
  - 2
  - 3
  - 4
  - 5
  - 6
  - 7
  - 8
  - 9
  - 10
  - 11
  - 12
  - 13
  - 14
  - 15
  - 16
  - 17
  - 18
  - 19
  - 20
  - 21
  - 22
  - 23
  - 24
  - 25
  - 26
  - 27
  - 28
  - 29
  - 30
  - 31
  - 32
  - 33
  - 34
  - 35
  - 36
  - 37
  - 38
  - 39
  - 40
  - 41
  - 42
  - 43
  - 44
  - 45
  - 46
  - 47
  - 48
  - 49
  - 50
  - 51
  - 52
  - 53
  - 54
  - 55
  - 56
  - 57
  - 58
  - 59
  - 60
25. CBC News. Fredericton family doctor calls on province to help cut paperwork, free up time for patients. <https://www.cbc.ca/news/canada/new-brunswick/family-doctors-paperwork-new-brunswick-will-stymiest-medical-society-1.6734457>
26. Apaydin E. Administrative work and job role beliefs in primary care physicians: An analysis of semi-structured interviews. *SAGE Open*. 2020;10(1):2158244019899092. doi:10.1177/2158244019899092
27. Canadian Institute for Health Information. Discharge Abstract Database (DAD) metadata. Accessed October 3, 2023.
28. Canadian Institute for Health Information. National Health Expenditure Trends, 2022 — Methodology Notes. Ottawa, ON: CIHI; 2022.
29. WHO Collaborating Centre for Drug Statistics Methodology: International language for drug utilization research. Accessed April 10, 2023. <https://www.whocc.no>
30. Wagner, AK, Spumerai, SB, Zhang, F and Ross-Degnan, D. Segmented regression analysis of interrupted time series in medication use research. *Journal of Clinical Pharmacology and Therapeutics*. 2002;Aug 27(4):299-309.
31. Archibald MM, Ambagtsheer RC, Casey MG, Lawless M. Using zoom videoconferencing for qualitative data collection: Perceptions and experiences of researchers and participants. *International Journal of Qualitative Methods*. 2019;18:1609406919874596. doi:10.1177/1609406919874596
32. Gruber M, Eberl JM, Lind F, Boomgaarden HG. Qualitative Interviews with irregular migrants in times of COVID-19: Recourse to remote interview techniques as a possible methodological adjustment. *Forum Qualitative Sozialforschung / Forum: Qualitative Social Research*. 2021;22(1). doi:10.17169/fqs-22.1.3563
33. Sandelowski M. Sample size in qualitative research. *Research in Nursing & Health*. 1995;18(2):179-183. doi:10.1002/nur.4770180211
34. Morse JM. Analytic Strategies and Sample Size. *Qualitative Health Research*. 2015;25(10):1317-1318. doi:10.1177/1049732315602867
35. Morse JM. Designing funded qualitative research. In: *Handbook of Qualitative Research*. Sage Publications, Inc; 1994:220-235.
36. Lavergne MR, Goldsmith LJ, Grudniewicz A, et al. Practice patterns among early-career primary care (ECPC) physicians and workforce planning implications: protocol for a mixed methods study. *BMJ Open*. 2019;9(9):e030477. doi:10.1136/bmjopen-2019-030477
37. Hedden L. *Beyond Full-Time Equivalents: Gender Differences in Activity and Practice Patterns for BC's Primary Care Physicians*. PhD Thesis. University of British Columbia; 2015.



- 1  
2  
3  
4  
5  
6  
7  
8  
9  
10  
11  
12  
13  
14  
15  
16  
17  
18  
19  
20  
21  
22  
23  
24  
25  
26  
27  
28  
29  
30  
31  
32  
33  
34  
35  
36  
37  
38  
39  
40  
41  
42  
43  
44  
45  
46  
47  
48  
49  
50  
51  
52  
53  
54  
55  
56  
57  
58  
59  
60
38. Buddeberg-Fischer B, Stamm M, Buddeberg C, et al. The impact of gender and parenthood on physicians' careers - professional and personal situation seven years after graduation. *BMC Health Services Research*. 2010;10(1):40. doi:10.1186/1472-6963-10-40
  39. Jolly S, Griffith KA, DeCastro R, Stewart A, Ubel P, Jagsi R. Gender differences in time spent on parenting and domestic responsibilities by high-achieving young physician-researchers. *Annals of internal medicine*. 2014;160(5):344-353. doi:10.7326/M13-0974
  40. Canadian Institute for Health Information. 2022. <https://www.cihi.ca/en/nurse-practitioners>
  41. Braun V, Clarke V. *Thematic Analysis: A Practical Guide*. Sage Publications Ltd; 2022.
  42. Flick U. Challenges for a New Critical Qualitative Inquiry: Introduction to the Special Issue. *Qualitative Inquiry*. 2017;23(1):3-7. doi:10.1177/1077800416655829
  43. Denzin NK. Critical Qualitative Inquiry. *Qualitative Inquiry*. 2017;12(1). doi:doi.org/10.1177/1077800416681864
  44. Lincoln, Y. S., Lynham, S. A., & Guba, E. G. (2018). Paradigmatic controversies, contradictions, and emerging confluences, revisited. In N. K. Denzin & Y. S. Lincoln (Eds.), *The Sage handbook of qualitative research* (5th ed., pp. 108–150). Thousand Oaks, CA: Sage
  45. Boyland. J. A social constructivist approach to the gathering of empirical data. *Australian Counselling Research Journal*. 2019;30-34.
  46. Boyko JA, Lavis JN, Abelson J, Dobbins M, Carter N. Deliberative dialogues as a mechanism for knowledge translation and exchange in health systems decision-making. *Social Science & Medicine*. 2012;75(11):1938-1945. doi:10.1016/j.socscimed.2012.06.016
  47. Harvey N, Holmes CA. Nominal Group Technique: An effective method for obtaining group consensus. *International Journal of Nursing Practice*. 2012;18(2):188-194.
  48. Potter M, Gordon S, Hamer P. The Nominal Group Technique: a useful consensus methodology in physiotherapy research. *New Zealand Journal of Physiotherapy*. 2004;3(2):70-74.
  49. Guerra CE, McDonald VJ, Ravenell KL, Asch DA, Shea JA. Effect of race on patient expectations regarding their primary care physicians. *Family Practice*. 2007;25(1):49-55. doi:10.1093/fampra/cmn005
  50. Hedden, L., Barer, ML, Cardiff, K, McGrail, KM, Law, MR, Bourgeault, IL. The implications of the feminization of the primary care physician workforce on service supply: a systematic review. *Human Resources Health*. 2014;12:32. <http://www.human-resources-health.com/content/12/1/32>
  51. Bowen S, Graham I. Integrated knowledge translation. In: *Knowledge Translation in Health Care*. John Wiley & Sons, Ltd; 2013:14-23.

1  
2  
3  
4  
5  
6  
7  
8  
9  
10  
11  
12  
13  
14  
15  
16  
17  
18  
19  
20  
21  
22  
23  
24  
25  
26  
27  
28  
29  
30  
31  
32  
33  
34  
35  
36  
37  
38  
39  
40  
41  
42  
43  
44  
45  
46  
47  
48  
49  
50  
51  
52  
53  
54  
55  
56

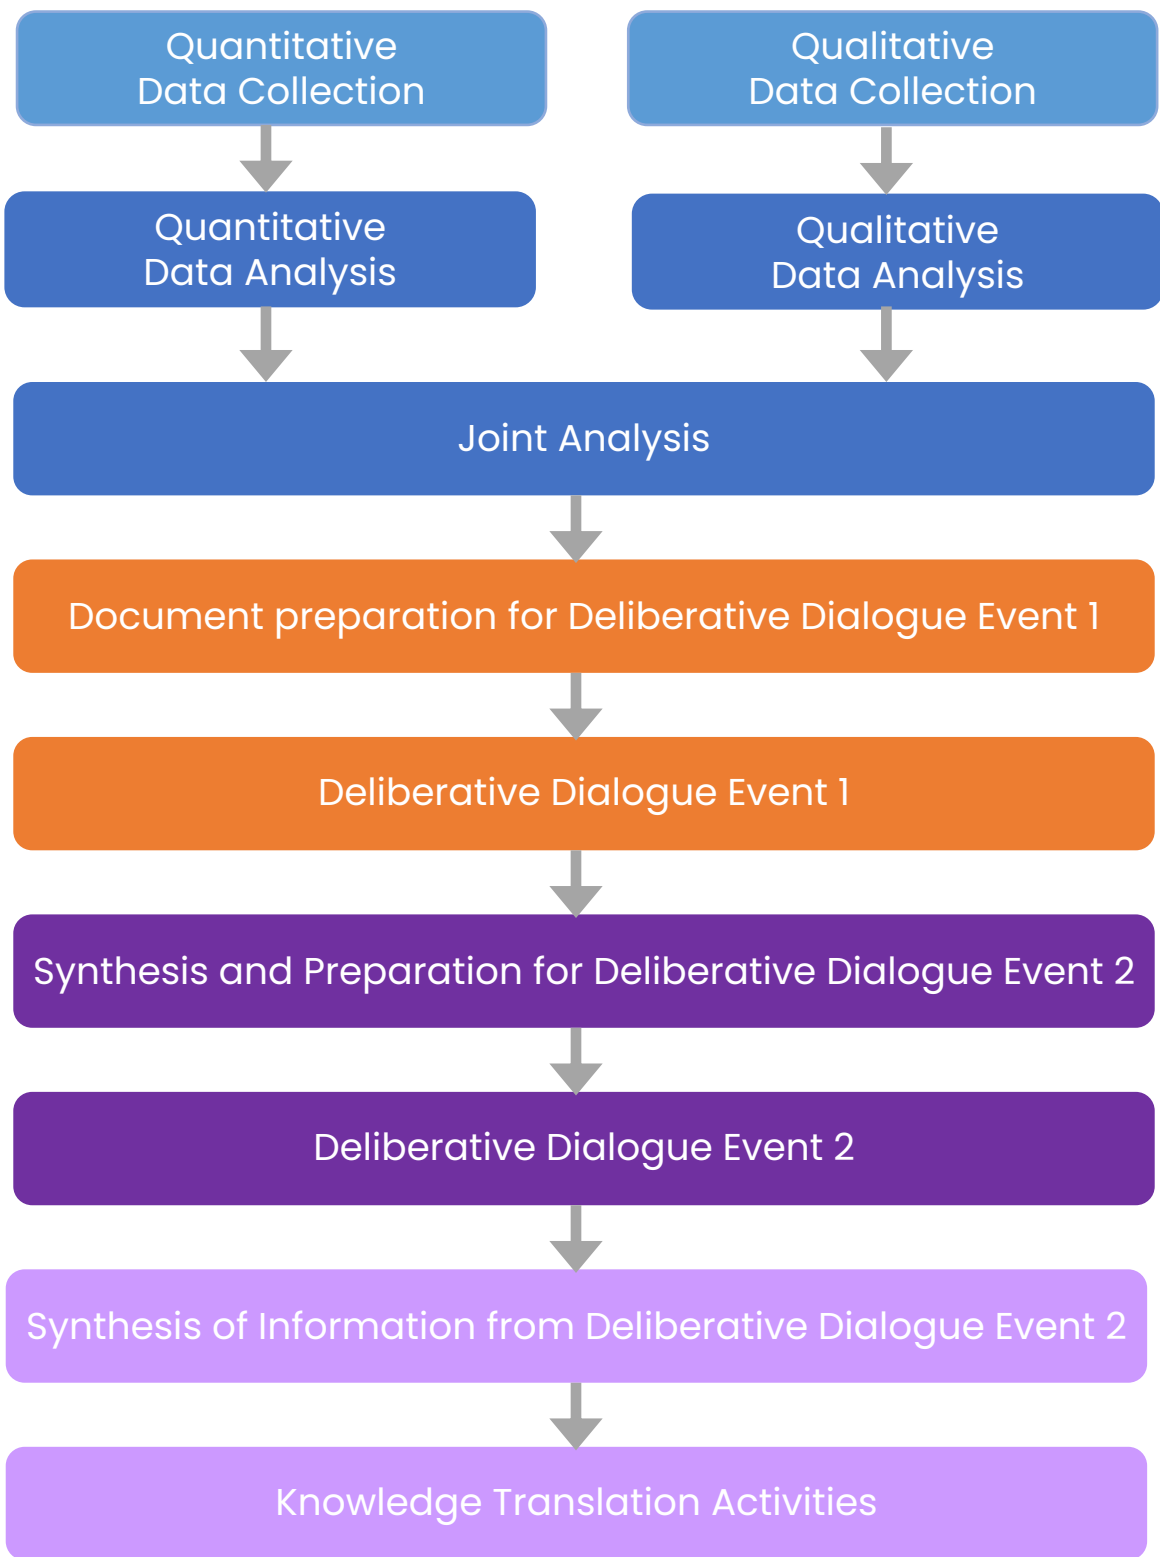

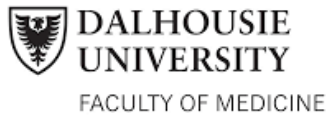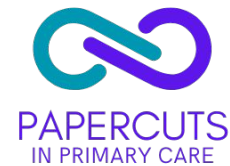**LANDING PAGE for survey**

<https://surveys.dal.ca/opinio/s?s=71694>

**STUDY TITLE:** A Thousand papercuts: Understanding and addressing changing administrative workload in primary care

**PRINCIPAL INVESTIGATOR:** M. Ruth Lavergne, Faculty Researcher  
Dalhousie University, [ruth.lavergne@Dal.ca](mailto:ruth.lavergne@Dal.ca)

Thank you for your interest in participating in an interview for our research study called "A Thousand papercuts: Understanding and addressing changing administrative workload in primary care." In this study we would like to better understand the breadth and distribution of administrative workload in primary care. We would like to learn more about the administrative tasks that family physicians, nurse practitioners, office managers, and office staff perform and how this work has changed over time. We hope that this study will help others to become more aware of the important work that you do and how valuable it is.

To be considered for an interview, please complete this survey and provide us with your contact information and profession. The survey has a short series of optional questions for you to answer. Please answer as many questions as you like. You are not obligated to answer any, although your answers will help us to select participants representing a diversity of practices and locations.

Your completion of the survey implies that you have consented to participate in this research. The information you provide in the survey will be kept confidential. You may exit the survey at any time and your information will not be saved. The survey is administered by Opinio, a tool hosted and supported by Dalhousie University. The survey data from Opinio is stored on Dalhousie University servers in Halifax, Nova Scotia, Canada and is endorsed for use by the Dalhousie Research Ethics Board. The information you give during the survey will be destroyed after the recruitment process has been completed.

If you are invited to participate in an interview, you will be provided with an information sheet about the study and the interview.

## Contact for Questions or Complaints

If you have any concerns or complaints about your rights as a research participant and/or your experiences while participating in this study, you may contact: the Research Ethics Board: [ResearchEthics@nshealth.ca](mailto:ResearchEthics@nshealth.ca)

## CONTACT INFO

Thank you for sharing your information. Please include your name and email address below so that if you are selected for an interview, we can contact you.

1. Name:
2. Please enter your email address. If email is not a suitable method of contact for you, please provide your preferred method and contact information:

## INFORMATION ABOUT YOURSELF

3. Please select the statement that applies to you:

- I am a practising family physician based in Nova Scotia
- I am a practising family physician based in New Brunswick
- I am a practising nurse practitioner based in Nova Scotia
- I am a practising nurse practitioner based in New Brunswick
- I am currently an administrative manager of a primary care clinic in Nova Scotia\*
- I am currently an administrative manager of a primary care clinic in New Brunswick\*
- I currently provide administrative support in a primary care clinic in Nova Scotia\*
- I currently provide administrative support in a primary care clinic in New Brunswick\*
- None of the above

*\*Administrative staff will be re-directed to question 6.*

*If none of the above is selected, an automatic message will pop up:* "Thank you for your interest in this study, however we are currently focusing on family physicians, nurse practitioners and administrative staff in primary care clinics in Nova Scotia and New Brunswick for this survey. If you would like to receive information about study findings, please indicate below the email address we can use to follow up with you."

\_\_\_\_\_ You may also visit our website

<https://www.healthsystemsresearch.ca/papercuts> for information about study outcomes.

1  
2 4a. Do you spend some of your time working in a community-based, longitudinal, comprehensive primary care  
3 clinic (i.e., traditional clinic-based family medicine practice)?

4  Yes

5  No

6  
7  
8  
9 4b. If yes to question 4a, are you responsible for managing or co-managing any/all practice operations (for  
10 example hiring and managing staff, dealing with building maintenance, overseeing all aspects of running  
11 the practice)?

12  Yes

13  No

14  
15  
16  
17  
18 5. What type of payment model are you on when providing community based longitudinal primary care?

19 Check all that apply:

20  Fee for service (FFS)

21  Alternative payment plan (APP)

22  Alternative funding plan (AFP)

23  Capitation

24  Salary

25  Blended

26  Other

27 If other, please specify \_\_\_\_\_

28  
29  
30  
31  
32  
33 6. Is your clinic location:

34  Urban

35  Suburban

36  Rural

37  Other

38 If other, please specify \_\_\_\_\_

39  
40  
41  
42 7. If you practice/work in Nova Scotia, which health zone is your clinic located in?

43  Not applicable to me

44  Central

45  Eastern

46  Northern

47  Western

48  Other

49 If other, please specify \_\_\_\_\_

1  
2 8. If you practice/work in New Brunswick, which health zone is your clinic located in?

3  Not applicable to me

4  Zone 1

5  Zone 2

6  Zone 3

7  Zone 4

8  Zone 5

9  Zone 6

10  Zone 7

11  Other

12 If other, please specify \_\_\_\_\_

13  
14  
15  
16  
17  
18 9. How many years have you been working at your current clinic?

19  less than 2 years

20  between 2-5 years

21  between 6-10 years

22  more than 10 years

23  
24  
25  
26 **The following question is optional. It will help our study team ensure breadth of interview participants.**

27  
28  
29  
30 10. What gender to you identify with?

31  Woman

32  Man

33  Transgender Woman/Trans Feminine

34  Transgender Man/Trans Masculine

35  Gender nonconforming/Nonbinary

36  Gender queer/Gender Fluid

37  Two-spirit

38  Prefer to self-describe \_\_\_\_\_

39  Prefer not to answer

40  
41  
42  
43  
44  
45  
46  
47  
48 **Thank you for sharing your time and experiences with us. If you are selected for an interview, you will be**  
49 **contacted by a member of our team in the near future.**

## Supplemental Study Information

### Papercuts Project

#### Interview Guide

#### Family Physicians & Nurse Practitioners

### Introduction

*Thank you for taking the time to participate in this interview today. Have you read through the information sheet about the study? [If no, the RA will provide verbal overview.] Do you have any questions? [RA responds to questions raised].*

*The interview questions will help us to better understand administrative work in primary care. I will begin with some questions about administrative tasks you do in your day-to-day work. We are interested in learning about tasks which are directly related to patient care as well as those which are not (for example, broader clinic operations). We'd also like to discuss how administrative practices have changed over time.*

*We'll then talk more about what work feels productive in that it contributes to clinic operations or patient care, and what feels unproductive or unnecessarily time consuming. We'd like to hear your thoughts about what changes could be made so that your time is used efficiently, and what the impact of administrative burdens have been on you and the office team. Just so you know, there are about 17 main questions in this interview.*

*If you are ready, I would like to begin recording the interview now. [RA begins recording of Zoom call]. For our records, do I have your consent to start the interview? Thank you.*

### PART ONE

**RA reviews participant's screening summary sheet and notes any clarifications/changes.**

- 1. Can we start off with you briefly describing your practice setting?**
- 2. Can you tell me about your administrative work – what does that include?**
- 3. Have these tasks changed from when you started practicing? In what ways? Why?**
  - Prompt: Has there been an increase or decrease in time spent on those tasks from when you started practicing to now?
  - Prompt: Why do you think that is?

- ◆ Changing patient demographics
- ◆ Increasing chronic illness or patient complexity
- ◆ Changing patient expectations
- ◆ Changing administrative processes required by other parts of the health system (e.g., forms, referral processes, IT platforms)
- ◆ Needs related to non-medical determinants of health and access to social supports

→ Prompt: Can you tell me about changes to admin tasks during COVID-19?

**4. What role does gender play, if any, with respect to administrative workload?**

→ Prompt: Do you think gender shapes patient expectations? How?

→ Prompt: Do you think gender shapes expectations for how work is shared among colleagues? Why is that?

**5. Can you think of anything else about how others may perceive you - that could affect your administrative work? (age, languages spoken, ethnicity in Canada, race, etc.)**

**6. Does administrative work impact the level of morale in your office? How so?**

→ Prompt: Does administrative work impact your own morale?

→ Prompt: Has this changed over time? How? Why?

**7. How has technology impacted your experiences coordinating administrative tasks?**

→ Prompt: What are the barriers, if any, to using technology more efficiently in your practice?

→ Prompt: How does your EHR system shape your administrative work?

→ Prompt: Have you identified areas in which the system could be improved? Can you tell me more about that?

**8. Do you spend time on administrative tasks outside of your regular work day? What does that look like for you?**

→ Prompt: How do you feel about that?

→ Prompt: What strategies have you used in the past to decrease your “extra/overtime” hours?

→ Prompt: How did that go? What could be done differently if you tried something similar again?

**9. Can you comment on whether or not your administrative work impacts your ability to engage in other professional interests? (for example: supervising/mentoring learners, \*engaging in advocacy activities, \*having time for your own professional development, \*community involvement/public health education)**

→ Prompt: Have you taken on more or fewer learners in your practice as the administrative burden has changed?

→ Prompt: Do you mentor your medical learners differently to adapt to administrative demands?

→ Prompt: If you have had to cut back or cut out \*those activities altogether, how has that impacted you? How have others responded to this change?



1  
2  
3  
4  
5 **10. Can you tell me if other team members work with you to manage administrative tasks? What does that look like?**

6 → Prompt: How do you communicate about this work within your team?

7 → Prompt: Are there additional roles other team members could take on?

8 → Prompt: What would need to happen to make that possible?  
9  
10  
11

12  
13 **11. Who makes decisions about changes to administrative processes? How do changes play out?**

14 → Prompt: Can you give me an example within your practice setting?

15 → Prompt: Can you give me an example of changes to administrative processes that were initiated by external  
16 organizations or practices?  
17

18 → Prompt: Who is consulted about these changes?  
19  
20  
21  
22

23 *Now, I'd like to go into further detail about some of the administrative work we've been discussing.*  
24  
25

26 **PART TWO**  
27

28  
29  
30 **12. Reflecting back on what we just talked about, could you tell me which areas of administrative work feels most**  
31 **productive to you? (By productive, we mean good use of your time)**

32 → Prompt: This could include tasks that:

- 33 ● Support access to care for patients
- 34 ● Strengthen clinical relationships
- 35 ● Increase efficiency of your practice
- 36 ● Increase efficiency for the broader system
- 37
- 38
- 39
- 40
- 41
- 42

43 **13. Which aspects of your administrative work are of greatest concern for you?**

44 **For each area of concern:**

- 45 ● What makes this an area of concern for you?
- 46 ● How would you say the volume of this work has changed over time since you've been in practice?
- 47 ● Do other team members help with this work?  
48  
49  
50  
51  
52  
53  
54  
55  
56  
57  
58  
59  
60

1  
2  
3  
4 **14. Can you suggest any strategies that would make this more efficient for you?**

- 5  
6 → Are there low-value processes that can be reduced/eliminated/redirected?  
7  
8 → Are there ways to improve efficiency of processes?  
9  
10 → Are there opportunities to optimize distribution of workload within teams?  
11

12  
13 **15. Are there strategies that could be implemented within your workplace, or would other systems or agencies need**  
14 **to be involved?**  
15

16  
17  
18 **16. Have you tried 'new' strategies in the past? How did that go?**  
19

20  
21  
22 **17. Do you feel that the administrative work you do is recognized and valued by others? Why? Why not?**  
23  
24  
25

26 **WRAP UP**  
27

28 **Do you have anything else you'd like to say about the administrative aspects of your practice?**  
29  
30  
31  
32  
33

34  
35 **RESEARCH ADMINISTRATION**  
36  
37

38  
39 We'd like to send you a cheque as a token of our appreciation for your time today.  
40

41 *Interviewer records mailing address*  
42  
43  
44  
45  
46  
47

48  
49 **Thank you for speaking with me today.**  
50  
51  
52  
53  
54  
55  
56  
57  
58  
59  
60

**Papercuts project****Interview Guide****Administrative Staff****Introduction**

*Thank you for taking the time to participate in this interview today. Have you read through the information sheet about the study? [If no, the RA will provide verbal overview.] Do you have any questions? [RA responds to questions raised.]*

*The interview questions will help us to better understand administrative work in primary care. I will begin with some questions about administrative tasks you do in your day-to-day work. We are interested in learning about tasks which are directly related to patient care as well as those which are not (for example, broader clinic operations). We'd also like to discuss how administrative practices have changed over time.*

*We'll then talk more about what work feels productive in that it contributes to clinic operations or patient care, and what feels unproductive or unnecessarily time consuming. We'd like to hear your thoughts about what changes could be made so that your time is used efficiently, and what the impact of administrative burdens have been on you and the office team. Just so you know, there are about 17 main questions in this interview.*

*I would like to begin recording this session now. Is that alright with you? [RA begins recording of Zoom call]. For our records, do I have your consent to start the interview? Thank you.*

**PART ONE****RA reviews participant's screening summary sheet and notes any clarifications/changes****1. What is your job title?**

- Does that title fit with what you actually do in your role? Why, why not?

**2. Could you tell me about the office where you work?**

- How long have you been working there?
- Is it just you, or are there others on the administrative team?
- Briefly, how do their roles differ from yours?
- What training is provided?

- 1  
2  
3 **3. We'll go into the details of your specific work responsibilities a little later, but for now, could you give me a**  
4 **brief overview of your tasks? Could you tell me what a typical work week is like for you?**  
5  
6  
7  
8 **4. Have these tasks changed over time since you've been working there? In what ways? Why?**  
9 → Prompt: Has there been an increase or decrease in time spent on those tasks from when you started working  
10 there to now?  
11 → Prompt: Why do you think that is?  
12 ◆ Changing patient demographics  
13 ◆ Increasing chronic illness or patient complexity  
14 ◆ Changing patient expectations  
15 ◆ Changing administrative processes required by other parts of the health system (e.g., forms, referral  
16 processes, IT platforms)  
17 ◆ Needs related to non-medical determinants of health and access to social supports  
18  
19 → Prompt: Can you tell me about changes to admin tasks during COVID-19?  
20  
21  
22  
23  
24  
25  
26  
27  
28 **5. What role does gender play, if any, with respect to administrative workload?**  
29 → Prompt: Do you think gender shapes patient expectations or how patients treat you?  
30 → Prompt: Do you think gender shapes expectations for how work is shared among colleagues?  
31  
32  
33  
34 **6. Can you think of anything else about how others may perceive you - that could affect your administrative work?**  
35 (age, languages spoken, ethnicity in Canada, race, etc.)  
36  
37  
38  
39 **7. Do you feel that the administrative work you do is recognized and valued by others? Why? Why not?**  
40  
41  
42  
43 **8. Back to administrative tasks now - Which of your administrative activities do you enjoy most? Why?**  
44  
45  
46 **9. Which of your tasks, if any, do you find challenging? Why?**  
47  
48  
49 **10. How has technology impacted your experiences coordinating those administrative tasks?**  
50 → Prompt: What are the barriers, if any, to using technology more efficiently in your office?  
51 → Prompt: How does your EHR system shape your administrative work?  
52 → Prompt: Have you identified areas in which the system could be improved? Can you tell me more about that?  
53  
54  
55  
56  
57  
58  
59  
60

1  
2  
3 **11. Is anyone else in the office familiar enough with your admin responsibilities to cover for you?**

4 → Prompt: How has that worked? What was the impact?  
5  
6  
7

8 **12. What happens when staff who have administrative responsibilities come and go?**

9 → Prompts: Who manages the training?

10  
11 ◆ How has that gone in the past?  
12

13 → Prompts: Do you have an office procedures manual? Can you tell me more about that?

14 ◆ Who maintains it?

15 ◆ How is that going?/ Is it used often?

16 ◆ Have there been any challenges along the way? Can you tell me more about that?  
17  
18  
19

20 **13. Do you have team meetings?**

21  
22 **If yes**

23 → Prompt: How often; what topics are discussed?

24 → Prompt: Are your comments/suggestions listened to and acted on?

25 → Prompt: Can you tell me more about that?  
26  
27

28 → Prompt: What kinds of changes have been made to office procedures as a result of these meetings and who  
29 initiated the changes?  
30

31 → Prompt: Anything else you'd like to say about team meetings?  
32  
33

34 **If no**

35 → Prompt: Why is that?

36 → Prompt: Did you ever have team meetings – what happened and why?

37 → Prompt: Do you chat informally and does that work well for you? Why, Why not?  
38

39 → Prompt: Is there anything else you'd like to say about office communication and how it affects your work?  
40  
41  
42

43 **PART TWO**

44  
45 **14. Reflecting back on what we just talked about, could you tell me which areas of administrative work feels most**  
46 **productive to you?**  
47

48 a. Prompt: This could include tasks that:

49 i. Support access to care for patients

50 ii. Strengthen patient and other relationships

51 iii. Increase efficiency of the office / practice

52 iv. Increase efficiency for the broader system  
53  
54  
55  
56  
57  
58  
59  
60

1  
2  
3 **15. Which areas of administrative work are of greatest concern for you?**

4 **For each area of concern:**

- 5  
6 a. What makes this an area of concern for you?  
7  
8 b. How would you say the volume of this work has changed over time since you've been working there?  
9  
10 c. What is your process?  
11  
12 d. Do other team members help with this work?  
13  
14 e. Can you suggest any strategies that would make this more efficient for you?  
15     ○ Are there low-value processes that can be reduced/eliminated?  
16     ○ Are there ways to improve efficiency of processes?  
17  
18 f. Are there opportunities to optimize distribution of workload within teams?  
19  
20 g. Are these strategies that could be implemented within your workplace, or would other systems or agencies need  
21 to be involved?  
22  
23 h. Have you tried new strategies in the past? How did that go?  
24  
25

26 **16. Do you have anything else you'd like to tell us about your work in the office?**

27  
28  
29  
30 **17. Is there anything else you think is important for us to know?**

31  
32  
33  
34 **Research Administration:**

35 **We'd like to send you a token of our appreciation for your time today.**

36  
37 **What address should we send it to?**

38  
39  
40  
41 **Thank you so much for speaking with me today.**  
42  
43  
44  
45  
46  
47  
48  
49  
50  
51  
52  
53  
54  
55  
56  
57  
58  
59  
60

# BMJ Open

## Understanding and addressing changing administrative workload in primary care in Canada: Protocol for a mixed method study

|                                 |                                                                                                                                                                                                                                                                                                                                                                                                                                                                                                                                                                                                                                                                                                                                                                                                                                                                                                                                                                |
|---------------------------------|----------------------------------------------------------------------------------------------------------------------------------------------------------------------------------------------------------------------------------------------------------------------------------------------------------------------------------------------------------------------------------------------------------------------------------------------------------------------------------------------------------------------------------------------------------------------------------------------------------------------------------------------------------------------------------------------------------------------------------------------------------------------------------------------------------------------------------------------------------------------------------------------------------------------------------------------------------------|
| Journal:                        | <i>BMJ Open</i>                                                                                                                                                                                                                                                                                                                                                                                                                                                                                                                                                                                                                                                                                                                                                                                                                                                                                                                                                |
| Manuscript ID                   | bmjopen-2023-076917.R2                                                                                                                                                                                                                                                                                                                                                                                                                                                                                                                                                                                                                                                                                                                                                                                                                                                                                                                                         |
| Article Type:                   | Protocol                                                                                                                                                                                                                                                                                                                                                                                                                                                                                                                                                                                                                                                                                                                                                                                                                                                                                                                                                       |
| Date Submitted by the Author:   | 22-Nov-2023                                                                                                                                                                                                                                                                                                                                                                                                                                                                                                                                                                                                                                                                                                                                                                                                                                                                                                                                                    |
| Complete List of Authors:       | Lavergne, M.; Dalhousie University Faculty of Medicine, Department of Family Medicine; Simon Fraser University<br>Moravac, Catherine; Dalhousie University Faculty of Medicine, Family Medicine<br>Bergin, Fiona; Dalhousie University Faculty of Medicine, Practice Ready Assessment Program<br>Buote, Richard; College of Family Physicians of Canada<br>Easley, Julie; Horizon Health Network, Family Medicine<br>Grudniewicz, Agnes; University of Ottawa, Telfer School of Management<br>Hedden, Lindsay ; Simon Fraser University,<br>Leslie, Myles; University of Calgary,<br>McKay, Madeleine; Doctors Nova Scotia<br>Marshall, Emily; Dalhousie University, Family Medicine<br>Martin-Misener, Ruth; Dalhousie University,<br>Mooney, Melanie; Nova Scotia Health Authority, Primary Health Care and Chronic Disease Management<br>Palmer, Erin; Dalhousie University Faculty of Medicine<br>Tracey, Joshua; Dalhousie University Faculty of Medicine |
| <b>Primary Subject Heading</b>: | General practice / Family practice                                                                                                                                                                                                                                                                                                                                                                                                                                                                                                                                                                                                                                                                                                                                                                                                                                                                                                                             |
| Secondary Subject Heading:      | Health services research                                                                                                                                                                                                                                                                                                                                                                                                                                                                                                                                                                                                                                                                                                                                                                                                                                                                                                                                       |
| Keywords:                       | Primary Care < Primary Health Care, HEALTH SERVICES ADMINISTRATION & MANAGEMENT, Organisation of health services < HEALTH SERVICES ADMINISTRATION & MANAGEMENT, Human resource management < HEALTH SERVICES ADMINISTRATION & MANAGEMENT                                                                                                                                                                                                                                                                                                                                                                                                                                                                                                                                                                                                                                                                                                                        |
|                                 |                                                                                                                                                                                                                                                                                                                                                                                                                                                                                                                                                                                                                                                                                                                                                                                                                                                                                                                                                                |

SCHOLARONE™  
Manuscripts

1  
2  
3 **Understanding and addressing changing administrative workload in primary**  
4 **care in Canada: Protocol for a mixed method study**  
5  
6  
7

8 Author: Ruth Lavergne  
9

10 Co-Authors: Catherine Moravac  
11 Fiona Bergin  
12 Richard Buote  
13 Julie Easley  
14 Agnes Grudniewicz  
15 Lindsay Hedden  
16 Myles Leslie  
17 Madeleine McKay  
18 Emily Gard Marshall  
19 Ruth Martin-Misener  
20 Melanie Mooney  
21 Erin Palmer  
22 Joshua Tracey  
23  
24  
25  
26  
27

28 Corresponding Author: Dr. Ruth Lavergne  
29 Tier II Canada Research Chair in Primary Care  
30 Associate Professor  
31 Primary Care Research Unit  
32 Department of Family Medicine  
33 Dalhousie University  
34 1465 Brenton Street, Suite 402  
35 Halifax Nova Scotia  
36 B3J 3T4  
37 CANADA  
38  
39

40 [Ruth.lavergne@dal.ca](mailto:Ruth.lavergne@dal.ca)

41 Phone: 1-902-473-4741

42 Fax: 1-902-473-4760  
43  
44  
45  
46

47 Co-Authors: Fiona Bergin  
48 Dalhousie University  
49 Halifax, Nova Scotia  
50 CANADA  
51  
52  
53  
54  
55  
56  
57



1  
2  
3  
4  
5 Richard Buote  
6 College of Family Physicians of Canada  
7 Mississauga, Ontario  
8 CANADA  
9

10  
11 Julie Easley  
12 Horizon Health Network  
13 Fredericton, New Brunswick  
14 CANADA  
15

16  
17 Agnes Grudniewicz  
18 Telfer School of Management  
19 University of Ottawa  
20 Ottawa, Ontario  
21 CANADA  
22

23  
24 Lindsay Hedden  
25 Simon Fraser University  
26 Burnaby, British Columbia  
27 CANADA  
28

29  
30 Myles Leslie  
31 University of Calgary  
32 Calgary, Alberta  
33 CANADA  
34

35  
36 Madeleine McKay  
37 Doctors Nova Scotia  
38 Dartmouth, Nova Scotia  
39 CANADA  
40

41  
42 Emily Gard Marshall  
43 Dalhousie University  
44 Halifax, Nova Scotia  
45 CANADA  
46

47  
48 Ruth Martin-Misener  
49 Dalhousie University  
50 Halifax, Nova Scotia  
51 CANADA  
52  
53  
54  
55  
56

1  
2  
3  
4  
5  
6  
7  
8  
9  
10  
11  
12  
13  
14  
15  
16  
17  
18  
19  
20  
21  
22  
23  
24  
25  
26  
27  
28  
29  
30  
31  
32  
33  
34  
35  
36  
37  
38  
39  
40  
41  
42  
43  
44  
45  
46  
47  
48  
49  
50  
51  
52  
53  
54  
55  
56  
57  
58  
59  
60

Melanie Mooney  
Nova Scotia Health Authority  
Yarmouth, Nova Scotia  
CANADA

Catherine Moravac  
Dalhousie University  
Halifax, Nova Scotia  
CANADA

Erin Palmer  
Dalhousie University  
St. John, New Brunswick  
CANADA

Joshua Tracey  
Dalhousie University  
St. John, New Brunswick  
Nova Scotia  
CANADA

**Key Words:** Primary Health Care  
Health Services Administration and Management  
Organization of Health Services  
Administrative Workload

**Word Count:** 4,388 (excluding title page, abstract, strengths & limitations, flow chart and references)

# Understanding and addressing changing administrative workload in primary care in Canada: Protocol for a mixed method study

## Abstract

### *Introduction*

Many Canadians struggle to access the primary care they need while at the same time primary care providers report record levels of stress and overwork. There is an urgent need to understand factors contributing to the gap between a growing per-capita supply of primary care providers and declines in the availability of primary care services. The assumption of responsibility by primary care teams for services previously delivered on an in-patient basis, along with a rise in administrative responsibilities may be factors influencing reduced access to care.

### *Methods and Analysis*

In this mixed methods study our first objective is to determine how the volume of services requiring primary care coordination has changed over time in the Canadian provinces of Nova Scotia and New Brunswick. We will collect quantitative administrative data to investigate how services have shifted in ways that may impact administrative workload in primary care. Our second objective is to use qualitative interviews with family physicians, nurse practitioners, and administrative team members providing primary care to understand how administrative workload has changed over time. We will then identify priority issues and practical response strategies using two deliberative dialogue events convened with primary care providers, clinical and system leaders, and policymakers.

We will analyze changes in service use data between 2001/2 and 2021/22 using annual total counts, rates per capita, rates per primary care provider, and per primary care service. We will conduct reflexive thematic analysis to develop themes and to compare and contrast participant responses reflecting differences across disciplines, payment and practice models, and practice settings. Areas of concern and potential solutions raised during interviews will inform deliberative dialogue events.

### *Ethics and Dissemination*

We received research ethics approval from Nova Scotia Health (#1028815). Knowledge translation will occur through dialogue events, academic papers, and presentations at national and international conferences.

## Strengths & Limitations

- This study will involve both quantitative and qualitative data complemented by deliberative dialogue events for robust description, analysis, and actionable recommendations.
- Trustworthiness of qualitative methods and analysis will be demonstrated through inclusion of three professional groups working in two provinces, the positionality and reflexivity of diverse research team members, the use of constant comparison throughout concurrent data collection, thick description, and an audit trail.
- A population-level analysis of factors shaping changing workload will inform trends for system-wide planning, but won't provide detailed clinician-level information

## Introduction

There are more primary care providers per person than ever before in Canada.(1) At the same time, primary care is described as being in crisis,(2-4) as Canadians struggle to access needed care(5) and primary care providers report record levels of stress and overwork.(6) There is an urgent need to understand factors contributing to the gap between a growing number of primary care providers per person and declines in the availability of primary care services.(7) To some extent this gap may reflect declining hours worked(8) or service volume (9) per physician, but evidence also points to broader health system changes that may impact workload in primary care(10) over and above visit volume. Neither the extent of these changes, nor their impact on provider experience and patient access have been carefully studied.(6)

Beyond patient visits, primary care providers (including family physicians (FPs) and nurse practitioners (NPs)) are responsible for indirect patient care activities such as arranging prescriptions, lab tests, imaging, specialist referrals, and medical forms, as well as maintaining a longitudinal patient record.(11) Over the past 20 years we have seen a shift in care from hospitals to communities,(12) a proliferation of guidelines and increased complexity in the management of common chronic conditions,(13-16) and accelerating population aging. (17, 12, 18) The intersecting effects of these trends may mean that there is greater need than ever for care coordination or indirect patient care, contributing to expanding administrative workload in primary care. Navigating electronic medical records, complicated referral processes, and cumbersome forms, may be increasing the time needed to complete indirect patient related tasks. Patients may be referred by primary care providers to programs or specialists as part of the overall care plan. These referrals, however, often result in additional administrative work and record-keeping responsibilities. Paperwork and tasks flow back to primary care from referral sources, further increasing workload. In addition to administrative responsibilities related to care coordination, primary care providers play varied roles in clinic administration, depending on service delivery model.

Administrative workload has been described as a source of burnout and reduced access to care for patients, and may push family physicians to choose options other than comprehensive community-based practice.(19) This has been casually called "death by a thousand papercuts"

1  
2  
3 or more recently “death by a thousand clicks.”(20) Under this view, time spent on a variety of  
4 administrative tasks is secondary to the ‘real’ work of primary care. Indeed administration has  
5 been broadly characterized as taking away from other patient care activities, thereby making  
6 health systems less efficient and also less equitable, as people who most need coordinated care  
7 may struggle to access it.(10,21) At the same time, administrative work is central to delivering  
8 coordinated and integrated care to patients and to clinic operations.  
9  
10

11  
12 Outcomes of a survey conducted by Doctors Nova Scotia published in December 2021 revealed  
13 that administrative burdens were included among the top three challenges facing primary care  
14 physicians in that province.(22) The magnitude of this problem led to the involvement of the  
15 Office of Regulatory Affairs and Service Effectiveness (ORASE) of the Nova Scotia government to  
16 investigate and implement concrete action plans to address unnecessary administrative  
17 burdens on physicians.(23) With the support of Doctors Nova Scotia, a survey administered by  
18 ORASE found that 38% of physicians’ time was spent on unnecessary administrative tasks, and  
19 that 24% of that work could have been done by someone in a different role/profession.(23) The  
20 survey also found that physicians believed that 14% of that work could be entirely  
21 eliminated.(23) The report on the survey noted that the main contributors to unnecessary  
22 administrative tasks were: the completion of medical forms, doctor’s notes, business  
23 operations, billing, including shadow billing, licensing, privileging, and tasks associated with  
24 requirements of government and oversight entities. Importantly, physicians indicated that  
25 administrative burdens significantly contributed to burnout, and that reductions of time spent  
26 on these tasks would allow time for improved work/life balance and improved patient  
27 care.(23) While administrative burden is a problem for all acute, specialist, and primary care  
28 physicians in Nova Scotia, given the unique role primary care physicians play in coordinating  
29 care, we need detailed information about, and solutions for, this setting.  
30  
31  
32  
33  
34

35 The impact of administrative burdens in primary care is complex. It is not simply a problem of  
36 too much paperwork. Family physicians and nurse practitioners are also increasingly  
37 responding to issues related to patients’ social determinants of health without adequate  
38 support and resources, often resulting in frustration, stress, and emotional burden.(23) Wait  
39 times for specialist referrals translate to lengthier periods of patient management, additional  
40 paperwork, follow-up on referrals, and carrying the emotional burden of patients’ unmet  
41 needs. Added to these pressures are expectations to take on more ‘unattached’ patients, while  
42 not having the time or capacity to do so because of the complexity of care required by existing  
43 patients coupled with heavy administrative burdens. While the emotional toll of administrative  
44 burden on primary care providers is not the focus of this study, it is important to recognize that  
45 there are many concerning ripple effects that accompany this problem.  
46  
47  
48

49 A 2023 study(24) built on the findings of the ORASE’s Physician Administrative Burden Survey  
50 conducted in Nova Scotia. Study outcomes demonstrated that a 10% reduction of unnecessary  
51 paperwork for primary care physicians in New Brunswick would equal an additional 119,726  
52 patient visits annually.(25) While increased recognition of this problem and attempts to address  
53 it are welcome, it comes with an implicit expectation that primary care providers will have the  
54  
55  
56

1  
2  
3 capacity to see new patients and/or increase the number of visits for existing patients. This  
4 expectation may add to primary care provider stress and emotional burden.  
5  
6

7 While there is some limited qualitative research with primary care physicians in the United  
8 States,(26) none yet exists in Canada. We also need information drawing on the experience and  
9 expertise of nurse practitioners, clinic managers, medical office assistants, and other primary  
10 care team members with administrative responsibilities. New information to understand the  
11 extent and drivers of administrative workload, as well as the strategies required to make this  
12 activity more efficient are urgently needed.  
13  
14

### 15 **Study Objectives**

16  
17 This project will address three objectives and nested research questions, with the overarching  
18 goal of adjusting administrative workload, while ensuring efficient, accountable, and well-  
19 coordinated care:  
20

- 21 1. Determine how the volume of services requiring primary care coordination has changed  
22 over time  
23 a. How has service volume shifted from inpatient services to outpatient and  
24 community-based services requiring coordination through primary care?  
25 b. How has the volume of outpatient services requiring primary care coordination and  
26 oversight (i.e., prescriptions, testing, imaging, and specialist consultations) changed  
27 over time?  
28  
29
- 30 2. Use interviews with primary care providers (family physicians and nurse practitioners)  
31 and administrative team members to understand how administrative workload has  
32 changed:  
33 a. What are current experiences of administrative workload, including work related to  
34 patient care and clinic administration?  
35 b. How has administrative workload changed over time? What factors have shaped  
36 changes?  
37 c. What are areas of particular concern and how might these be addressed?  
38  
39
- 40 3. Drawing on the findings of Objectives 1 and 2, with primary care providers and service  
41 planners, co-identify priority issues and co-develop practical response strategies to  
42 make administrative work more efficient:  
43 a. Which areas of concern are addressable in the short, medium and long term?  
44 b. What actions would be needed, who is in a position to act, and what resources would  
45 be involved?  
46  
47  
48  
49  
50  
51  
52  
53  
54  
55  
56  
57  
58  
59  
60

## Methods

This two-year study (June 2023 - May 2025) will use different data sources and methodologies to address each project objective within two study provinces, Nova Scotia and New Brunswick (Figure 1). Findings of descriptive quantitative analysis under Objective 1 and in-depth qualitative interviews under Objective 2 will inform deliberative dialogues used to address Objective 3.

### *Objective 1 - Quantitative administrative data*

To address Objective 1 we will seek out and combine administrative data from multiple sources to create a more complete picture of shifts in service use over time, accessing data from 2001/2 (or earliest available, depending on dataset) and 2023/2024 (or most recent available). This time frame will allow us to explore long-term trends, as well as changes since March 2020 due to the pandemic. We do not need access to individual, record-level data to meet study objectives and plan only population-level analysis, using population-based data that captures service delivery for all insured residents of the study provinces (approximately 1 million residents in NS and 800,000 in NB). To address question 1a we will combine publicly-available data accessible through the Canadian Institutes of Health Information at the provincial level to examine trends in hospital services use as well as services delivered on an outpatient basis or in the community. To examine trends in hospitalizations, we will count the number of discharges recorded in the Discharge Abstract Database (DAD) and the number of days patients spent in hospital.(27) The DAD captures administrative, clinical, and demographic information on all hospital discharges (including deaths, sign-outs and transfers). To capture outpatient physician service use, we will use the National Physician Database (NPD) to track number of visits with primary care physicians, as well as with medical specialists and surgical specialists. The NPD contains information on both the demographic characteristics, and their payments and activities within the health care system. We will use the DAD to count the number of day surgery procedures. Finally, we will use the National Health Expenditures Database to triangulate findings about service volume, examining shifts in spending between hospitals and other categories of healthcare over time.(28)

To address question 1b we will track total laboratory tests and imaging services completed for outpatients, as FP/NPs have a role in reviewing and coordinating these even when ordered by other physicians. Public prescription data for seniors will be used to count the number of different drugs dispensed per year, at the level of the first 5 digits of the Anatomical Therapeutic Chemical classification (ATC) code.(29) We will exclude vaccines (J07), vitamins (A11), mineral supplements (A12), tonics (A13) and various (V) categories. As with lab tests, as FP/NPs have a role in managing all prescriptions, we will report the total. We will use NPD to track specialist physician visit data, focusing on those seen as outpatients, as, as reports would go back to NPs/FPs for patient follow-up.

*Quantitative Analysis:* Our approach is primarily descriptive and it is not necessary to link datasets at the individual level. We will present service use data as annual total counts (to

1  
2  
3 capture how total workload has changed), as rates per capita (to capture how patient-level care  
4 has changed), as well as rates per primary care provider, and per primary care service (to  
5 capture how changes in workload map onto primary care workforce supply and practice  
6 volume). Following visual inspection of trends over time, we will use segmented regression to  
7 quantify changes in level or trend of service use over time, including in the context of the  
8 COVID-19 pandemic.(30)  
9  
10

### 11 *Objective 2 - In-depth video interviews*

12  
13

14 Our approach most closely resembles a mixed methods multi-level plan in which quantitative  
15 and qualitative data will be concurrently collected and analyzed, each with equal weight. The  
16 research questions we are attempting to answer through the use and analysis of quantitative  
17 data while complementary, are distinct from the research questions we are exploring through  
18 qualitative interviews and analysis. Findings from both methods will contribute to knowledge  
19 generation and may enhance each other, however it is impossible to know in advance of data  
20 collection and analysis precisely how this will evolve. We anticipate that findings from  
21 quantitative data on changes in service volume requiring primary care coordination will be  
22 better understood when complemented by narratives from the interviews that add important  
23 contextual information  
24  
25  
26

27 *Interviews:* We will use interviews with primary care providers (FPs, NPs, and other team  
28 members involved in administration (clinic managers and/or medical office assistants) to  
29 understand their current administrative workload (including care coordination and other  
30 administrative activities), how this has changed over time, and what opportunities exist to  
31 manage this differently. See supplementary material for interview guides. We will be  
32 interviewing primary care providers and administrative staff in New Brunswick as well as Nova  
33 Scotia to compare narratives between the two provinces, and to inform a planned Pan-  
34 Canadian study on this topic in the future.  
35  
36  
37

38 We will conduct interviews via a secure online video platform. Interviews will last  
39 approximately one hour and will be scheduled at a time that is convenient and acceptable to  
40 study participants. This will allow us to reach a geographically varied set of participants at a  
41 lower cost than conducting in-person interviews. Video interviews have been shown to produce  
42 similar data richness when compared with in-person interviews.(31,32) Interviews will be  
43 conducted by Master's or PhD trained qualitative research staff. Interview data will be digitally  
44 recorded, professionally transcribed, quality checked for accuracy, and de-identified prior to  
45 analysis. Each interviewer will complete field notes shortly after interviews take place. Field  
46 notes will be reviewed prior to and during analysis. The research associate will document all  
47 analytic decisions for the audit trail.  
48  
49  
50

51 *Recruitment:* We will purposively recruit primary care providers who are funded through a  
52 range of payment models (fee-for-service and alternate payment plans), who work in a range of  
53 clinic models (independent, health authority partnered, turn-key health authority operated),  
54 and who work in a range of geographic locations (urban and rural locations throughout each  
55  
56  
57



1  
2  
3 province). Specifically, we will recruit from Nova Scotia Health Primary Care Clinics, Dalhousie  
4 Family Medicine teaching sites, Doctors Nova Scotia, and Nurse Practitioners of New  
5 Brunswick. Potential participants will complete a brief on-line screening survey (see  
6 supplementary information.) We plan sample sizes of 20 FP/NP and 20 administrative team  
7 member interviews to investigate differences by models and locations. The total sample size is  
8 forty. This sample size is consistent with recommendations for similar study designs.(33-35)  
9 Previous research we conducted concerning primary care practice was received with strong  
10 interest;(36) we anticipate similarly strong interest in this topic.  
11  
12  
13

14 The project research associate will contact key individuals at recruitment organizations to  
15 explain the study and coordinate outreach. Key individuals at each site will distribute  
16 introductory emails along with a study poster. There will be a link from the poster to the  
17 screening survey. Our aim is to interview participants from various geographical settings,  
18 practice types, remuneration models, discipline (nurse practitioner, family physician,  
19 administration) and with varying lengths of practice experience and roles in primary care clinic  
20 settings. Sampling from the results of the screening survey will involve selection of interview  
21 participants with the greatest number of diverse characteristics. Sampling will depend on the  
22 number and diversity of survey responses. Additional recruitment will take place until sampling  
23 goals have been reached.  
24  
25  
26

27 Gender is of central importance in this project. A substantial body of evidence shows that  
28 physician practice patterns are gendered, as are expectations with respect to care provision,  
29 including potentially administrative workload.(37-39) We will be attentive to gender in both  
30 interview recruitment and qualitative analysis. As an increasing proportion of family physicians  
31 are women, and 92% of nurse practitioners in Canada(40) are female we will actively recruit  
32 men and ensure there are no barriers to participation for people with other genders. We will  
33 ask participants about how they perceive relationships between gender and administrative  
34 workload, and our analysis will explore how responses and experiences vary by gender.  
35  
36  
37

38 Informed Consent. Consent is implied by completion of the online survey. This is clearly  
39 articulated in the introductory text to the survey and has been approved by the local research  
40 ethics board. Potential participants selected for interviews will be contacted by the research  
41 associate. A participant information sheet covering all the topics typically included in consent  
42 forms will be provided at that time, and participants will have an opportunity to ask any  
43 questions they have before interviews are scheduled. At the beginning of each interview the  
44 research associate will review study aims, participant rights, and obtain verbal consent. The  
45 consent process will be audiotaped for documentation purposes.  
46  
47  
48

49 Each participant will be assigned an identification number in place of their name. All interview  
50 transcripts will bear the identification number. Participant quotes will be included in  
51 presentations and publications emanating from this study, however there will not be any  
52 personal identifiers. Quotes will be attributed to the type of professional, gender and province  
53 in which the person is practicing, with attention to any contextual details of practice that could  
54 be identifying.  
55  
56  
57

1  
2  
3 *Data Management:* Quantitative and qualitative data and consent forms will be securely stored  
4 on encrypted password-protected computers. Files are backed up monthly on an external drive.  
5 Both quantitative and qualitative data will be stored for a period of seven years after which it  
6 will be permanently destroyed in accordance with the policies of Dalhousie University.  
7  
8

9 *Qualitative Analysis:* We will employ Braun and Clarke's reflexive thematic analysis(41) which  
10 fits well with our critical qualitative approach(42,43) and relativist epistemology.(44) Our  
11 analysis will also be guided by social constructivism.(45) This blended approach reflects our  
12 positionality as active participants in the research process, our understanding that meaning is  
13 socially constructed, and the key role of reflexivity throughout the research process. There are  
14 six fluid phases involved when conducting reflexive thematic analysis. The first phase is  
15 becoming familiar with the interview data by reading through transcripts on several occasions.  
16 The next phase involves initial coding of data related to the research question. We plan to  
17 employ an inductive approach to analysis at that stage. This will be followed by the generation  
18 of preliminary themes. We will then return to the data, further develop and revise themes.  
19 Depending on the analysis in progress, we may continue with the inductive analysis, or we may  
20 decide to conduct a deductive analysis based on a concept or framework that we determine at  
21 that point may provide greater depth to the findings. In the latter case, we will return to the  
22 data and commence a new phase of coding deductively. This is what is meant by the fluidity of  
23 analytic phases. Once that phase has been completed, we will further refine and name themes  
24 and develop definitions for the themes. The final stage involves written preparation of the  
25 results including a discussion of their relevance to the existing literature.  
26  
27  
28  
29  
30

31 Initially each member of the qualitative working group will review 2-3 transcripts each. Working  
32 group members will meet weekly to discuss the transcripts and potential codes. The research  
33 associate will use NVivo software to begin the inductive coding process based on those  
34 discussions. We will begin by generating a detailed description of administrative workload  
35 (research question 2a). Analysis will occur concurrently with data collection and the interview  
36 guide will be iteratively adjusted if needed as our understanding of experiences of  
37 administrative workload develops. We will then expand analysis to explore changes over time  
38 (question 2b), and to make comparisons between FP/NP and administrative team member  
39 interviews, as well as to explore variation across payment model, practice model, and practice  
40 setting. To address research question 2c, and in preparation for Objective 3, we will group and  
41 compile areas of concern and potential solutions raised by participants.  
42  
43  
44  
45  
46

47 The qualitative working group will continue to meet bi-weekly or as needed throughout the  
48 analytic process. The diverse perspectives and expertise of group members will ensure a robust  
49 and meticulous analysis of qualitative data. We will have representation from family medicine,  
50 nursing, health administration and health policy, as well as expertise in qualitative research  
51 methods, ethnography and medical anthropology. Each interviewer will prepare field notes  
52 shortly after interviews take place. This may result in modifications to the interview guides.  
53  
54  
55  
56  
57

1  
2  
3 Field notes will be reviewed prior to and during analysis. The research associate will document  
4 all analytic decisions as part of the audit trail.  
5

6  
7 Time Frame: We expect the recruitment period and interviews to begin in September and be  
8 complete by the end December 2023. Qualitative analysis will also commence in September  
9 2023 and is expected to continue through to June 2024.  
10

### 11 *Objective 3 - Integration of findings and knowledge exchange*

12

13 We will work with partners on the team to identify relevant participants for a final two-phase  
14 dialogue event, designed to integrate and interpret both scientific and contextual data for the  
15 purpose of informing policy development,(46) in this case, strategies to address administrative  
16 workload. We will include 1) a subset of interview participants (primary care providers and  
17 administrative team members) working in varied contexts, 2) clinical leaders who can make  
18 changes within primary care service delivery environments, and 3) system administrators and  
19 policymaker leaders who can change processes that involve both primary care and other parts  
20 of the health system or sectors. We anticipate 12-15 participants will be involved in both the  
21 first and second stages of dialogue events.  
22  
23  
24

25 Prior to the first meeting, the study team will review quantitative findings and the initial list of  
26 areas of concern identified through qualitative interviews. These will be integrated into a  
27 background document circulated in advance of the dialogue process. Quantitative findings will  
28 inform changing administrative workload over time, and qualitative findings will provide  
29 context for areas of concern and potential solutions that will be explored during dialogue  
30 events. Dialogues will be conducted via video-conference in two stages. In the first stage,  
31 Nominal Group Technique (NGT)(47,48) will be used to guide discussion and prioritization of  
32 issues and solutions. Nominal Group Technique has been used since the 1960s for the  
33 identification of problems, priority ranking of issues, action items, or questions in small group  
34 in-person sessions. One of the technique's key strengths is it is designed for equal  
35 representation among participants and is non-hierarchical in nature. In this study, areas of  
36 concern generated and recorded in qualitative interviews will serve as a starting point for  
37 discussion, with participants invited to add topics not yet mentioned. In a ranking exercise,  
38 participants will be invited to consider which tasks are time consuming and/or offer lower value  
39 to patients and the system. Then participants will be asked to discuss and explain the reasons  
40 for their ranking.  
41  
42  
43  
44  
45

46 The second stage will focus on feasibility and actions needed to address high-priority areas of  
47 concern identified in the first event. Prior to the second stage, we will identify any additional  
48 participants with knowledge specific to areas of concern. Participants will be asked to consider  
49 which could be addressable in the short term (<3 months), medium term (3-12 months), and  
50 long term (one year or more). In breakout groups focusing on individual areas of concern,  
51 participants will be asked to consider what action would be needed and who would need to be  
52 involved. Each breakout group will be led by a facilitator briefed and prepared by the research  
53 team. After the breakout group discussions, there will be a debriefing with the full group of  
54  
55  
56

1  
2  
3 participants. The dialogue process will provide concrete and actionable strategies tailored to  
4 the primary care setting, which complement other ongoing work within Nova Scotia and New  
5 Brunswick health systems.  
6

### 7 **Impact on equity in recruitment and retention of healthcare professionals**

8  
9  
10 Administrative workload directly impacts recruitment and retention of healthcare  
11 professionals, at times influencing family physicians to choose options other than community-  
12 based primary care as a strategy to circumvent burnout.(19) Expectations for coordination may  
13 vary by how primary care providers are gendered and racialized(49); women form a growing  
14 proportion of the primary care workforce.(50) Addressing coordination workload can therefore  
15 play a role in supporting equity in recruitment and retention of health care professionals.  
16 Understanding and supporting coordination of care is central to people-centred, flexible,  
17 quality healthcare. Identifying practical strategies to make coordination more efficient can  
18 support innovative healthcare models, and more seamless integration of virtual care into  
19 patients' journeys.  
20  
21  
22

### 23 **Patient and Public Involvement**

24  
25  
26 Patients or members of the public were not involved in the design of this study and will not be  
27 involved during implementation. While our research questions respond to topics of patient and  
28 public interest, research approaches focus on routinely collected health system data and  
29 research participants are primary care providers and administrative staff. We therefore focus  
30 on including a range of policy and provider expertise and experience within the research team.  
31 Inclusion of patients in the deliberative dialogue events is not currently planned.  
32  
33

### 34 **Study Limitations**

35  
36  
37 Available quantitative data sources capture variables labeled "sex," but there is no measure of  
38 gender, and administrative or legal sex may not correspond to sex assigned at birth. This is a  
39 limitation of secondary analysis of these data. Where possible, we will distinguish between  
40 patterns plausibly shaped by sex or gender in interpretation.  
41

42  
43 Care coordination activities are not recorded in administrative billing data. It is not possible to  
44 directly capture time spent on care coordination or other administrative work. Instead, we  
45 focus broadly on shifts in care delivery between hospital and community, as well as changes in  
46 services that require coordination, review, and/or administration on the part of primary care  
47 providers. It is beyond the scope and budget of this project to obtain access to linked, record-  
48 level data or to collect detailed time use data. Study objectives can be addressed through  
49 aggregate data that can be shared with no risk of identification. This project will form the  
50 groundwork for a future grant proposal that will use record-level data from the same sources to  
51 analyze changes over time by population age and generate projections of future primary care  
52 capacity.  
53  
54  
55

### **Ethics and Dissemination**

Research ethics approval for this protocol was received from Nova Scotia Health (REB # 1028815) for research activities in both Nova Scotia and New Brunswick. This study conforms to the Declaration of Helsinki (June 1962; amended October 2013) and the Belmont Report (1979).

We are taking an integrated knowledge translation approach(51) and have assembled a team that includes varied perspectives. Primary care provider co-investigators and policy partners affirm the urgent need to address administrative workload. We will present findings and seek feedback from the groups represented by partners and team members following completion of Objectives 1 and 2. Deliberative dialogues under Objective 3 are themselves a method for knowledge translation, designed to integrate and interpret data to inform strategies addressing administrative workload. This project will also yield traditional academic outputs crossing multiple disciplines and results will be disseminated to a range of audiences.

Results will inform healthcare delivery excellence that addresses opportunities for team-based care and the ability of healthcare providers to work to their full scope of practice. New or expanded roles for administrative and other primary care team members are being piloted in Nova Scotia. This pilot research will enrich the understanding of our research outcomes and also support ongoing innovation. Finally, a robust system of primary care is fundamental to addressing health inequalities in access to care. There is evidence of declining equity in access to primary care in Canada.(7) Limited primary care capacity and inadequate systems of coordination impact patients with more complex health and social needs most severely. High-performing systems of primary care can connect health care with other community resources. This coordination is needed to support collaborative approaches to address the social determinants of health.

### Author Affiliations

<sup>1</sup>Department of Family Medicine, Dalhousie University, Nova Scotia, Canada.

<sup>2</sup>Horizon Health Network, Fredericton, New Brunswick, Canada.

<sup>3</sup>Telfer School of Management, University of Ottawa, Ottawa, Ontario, Canada.

<sup>4</sup>Faculty of Health Sciences, Simon Fraser University, Burnaby, British Columbia, Canada.

<sup>5</sup>School of Public Policy, University of Calgary, Alberta, Canada.

<sup>6</sup>Doctors Nova Scotia, Halifax, Nova Scotia, Canada.

<sup>7</sup>School of Nursing, Faculty of Health, Dalhousie University, Nova Scotia, Canada.

<sup>8</sup>Nova Scotia Health, Halifax, Nova Scotia, Canada.

<sup>9</sup>Department of Family Medicine, Dalhousie University, St. John's, New Brunswick, Canada.

### Author Contributions:

RL originally conceived the study, wrote the first draft of the Introduction and Objective 1 methods. CM wrote the first draft of Objective 2 methods. FB, RB, JE, AG, LH, ML, MM, EGM, RMM, MM, EP and JT provided feedback for revisions to the interview guides, screening questionnaire, and the draft protocol, and approved the final version for submission.

**Funding:** This study is supported by Research Nova Scotia

**Competing Interests:** None declared

**Patient and public involvement:** There was no patient or public involvement in the development of this protocol. Refer to methods section, page 8.

**Patient consent for publication:** N/A

**Provenance and peer review:** Not commissioned; peer reviewed for ethical and funding approval prior to submission.

### ORCIDiDs

Ruth Lavergne <http://orcid.org/0000-0002-4205-4600>

Fiona Bergin <http://orcid.org/0009-0001-4503-2933>

Richard Buote <http://orcid.org/0000-0001-7981-7854>

Julie Easley <http://orcid.org/0000-0002-1711-1343>

Agnes Grudniewicz <http://orcid.org/0000-0003-2960-8178>

Lindsay Hedden <http://orcid.org/0000-0001-9552-1324>

Myles Leslie <http://orcid.org/0000-0001-5759-7993>

Madeleine McKay <http://orcid.org/0009-0003-0652-2678>

Emily Gard Marshall <http://orcid.org/0000-0001-8327-0329>

Ruth Martin-Misener <https://orcid.org/0000-0003-4554-7635>

Melanie Mooney <http://orcid.org/0000-0002-2520-3168>

Catherine Moravac <http://orcid.org/0000-0002-3000-4980>

Erin Palmer <http://orcid.org/0009-0000-6742-8640>.

1  
2  
3 Joshua Tracey <http://orcid.org/0009-0009-0559-6273>  
4  
5  
6  
7  
8  
9  
10  
11  
12  
13  
14  
15  
16  
17  
18  
19  
20  
21  
22  
23  
24  
25  
26  
27  
28  
29  
30  
31  
32  
33  
34  
35  
36  
37  
38  
39  
40  
41  
42  
43  
44  
45  
46  
47  
48  
49  
50  
51  
52  
53  
54  
55  
56  
57  
58  
59  
60

For peer review only

## References

1. Canadian Institute for Health Information. *Supply, Distribution and Migration of Physicians in Canada, 2020- Data Tables*. CIHI; 2021.
2. Walsh M, Pearson H. *Nova Scotia Doctor Calls Family Doctor Shortage a "Crisis."* Accessed June 6, 2017. <http://globalnews.ca/news/3270444/nova-scotia-doctor-calls-family-doctor-shortage-a-crisis/>
3. The evolving crisis in primary care. *British Columbia Medical Journal*. Accessed August 16, 2022. <https://bcmj.org/editorials/evolving-crisis-primary-care>
4. Opinion: Canada has a primary-care crisis. Here are three steps we must take to solve this problem. *The Globe and Mail*. <https://www.theglobeandmail.com/opinion/article-canada-has-a-primary-care-crisis-here-are-three-steps-we-must-take-to/>. Published July 16, 2022. Accessed August 16, 2022.
5. Canadian Institute for Health Information. *How Canada Compares: Results from the Commonwealth Fund's 2020 International Health Policy Survey of the General Population in 11 Countries*. CIHI; 2021.
6. Sovran V, Ytsma A, Husak, L, and Johnson, T. Coordination of Care Could Improve: Canadian Results from the Commonwealth Fund International Health Policy Survey of Primary Care Physicians. *Healthcare Quarterly*. 2020;23(2). Accessed March 28, 2022. <https://www.longwoods.com/content/26283/coordination-of-care-could-improve-canadian-results-from-the-commonwealth-fund-international-health>
7. Lavergne MR, Bodner A, Peterson S, et al. Do changes in primary care service use over time differ by neighbourhood income? Population-based longitudinal study in British Columbia, Canada. *Int J Equity Health*. 2022;21(1):80. doi:10.1186/s12939-022-01679-4
8. Islam, R, Kraij, B and Sweetman, A. Physician workforce planning in Canada: the importance of accounting for population aging and changing physician hours of work. *Canadian Medical Association Journal*. 2023;195(9). doi: 10.1503/cmaj.221239
9. Rudlor, D, Perterson, S, Stock, D, et al. Changes over time in patient visits and continuity of care among graduating cohorts of family physicians in four Canadian provinces. *Canadian Medical Association Journal*. 2022;194(48). doi: 10.1503/cmaj.220439
10. Lavergne, R, Peterson S, Rudoler, D, et al. Productivity decline or administrative avalanche? Examining factors that shape changing workloads in primary care. *Healthcare Policy*. 2023;19(1):114-129
11. College of Family Physicians of Canada. *Family Medicine Professional Profile*. College of Family Physicians of Canada; 2018.



12. Chappell N, Hollander M. An Evidence-Based Policy Prescription for An Aging Population. *Healthcare Papers*. 2011;11(1):8-18. doi:10.12927/hcpap.2011.22246
13. Adams WL, McIlvain HE, Lacy NL, et al. Primary care for elderly people: Why do doctors find it so hard? *The Gerontologist*. 2002;42(6):835-842. doi:10.1093/geront/42.6.835
14. Mangin D, Sweeney K, Heath I. Preventive health care in elderly people needs rethinking. *BMJ*. 2007;335(7614):285-287. doi:10.1136/bmj.39241.630741.BE1
15. Korownyk C, McCormack J, Kolber MR, Garrison S, Allan GM. Competing demands and opportunities in primary care. *Canadian Family Physician*. 2017;63(9):664-668.
16. Millar E, Stanley J, Gurney J, et al. Effect of multimorbidity on health service utilisation and health care experiences. *J Prim Health Care*. 2018;10(1):44-53. doi:10.1071/HC17074
17. Barer ML, Evans RG, Hertzman C. Avalanche or glacier?: Health care and the demographic rhetoric. *Canadian Journal on Aging / La Revue canadienne du vieillissement*. 1995;14(2):193-224. doi:10.1017/S0714980800011818
18. Canadian Institute for Health Information. *Health Care in Canada, 2011: A Focus on Seniors and Aging*. Canadian Institute for Health Information; 2012. Accessed April 20, 2022. <https://www.deslibris.ca/ID/230734>
19. Kabir M, Randall E, Mitra G, et al. Resident and early-career family physicians' focused practice choices in Canada: a qualitative study. *Br J Gen Pract*. 2022;72(718):e334-e341. doi:10.3399/BJGP.2021.0512
20. Fortune FS Erika Fry. Death By 1,000 Clicks: Where Electronic Health Records Went Wrong. Kaiser Health News. Published March 18, 2019. Accessed June 17, 2022. <https://khn.org/news/death-by-a-thousand-clicks/>
21. Starfield B. The hidden inequity in health care. *International Journal for Equity in Health*. 2011;10(1):15. doi:10.1186/1475-9276-10-15
22. McKay M. The future of family medicine: Nova Scotia family physicians' visions and priorities. Final research report. Doctors Nova Scotia;2023.
23. Office of Regulatory Affairs and Service Effectiveness. *Physician Administrative Burden Survey – Final Report*. Government of Nova Scotia; 2020. Accessed August 18, 2022. <https://doctorsns.com/sites/default/files/2020-11/admin-burden-survey-results.pdf>
24. Alegbeh A. Patients before paperwork. Nova Scotia's approach to improving patient care by reducing physician red tape. Canadian Federation of Independent Business; 2023. Accessed March 31, 2023. <https://www.cfib-fcei.ca/en/research-economic-analysis/patients-before-paperwork-nova-scotias-approach-to-improving-patient-care-by-reducing-physician-red-tape>  
[https://20336445.fs1.hubspotusercontent-na1.net/hubfs/20336445/research/reports/2023/Patients\\_Before\\_Paperwork\\_Report\\_2023.pdf](https://20336445.fs1.hubspotusercontent-na1.net/hubfs/20336445/research/reports/2023/Patients_Before_Paperwork_Report_2023.pdf)

- 1
  - 2
  - 3
  - 4
  - 5
  - 6
  - 7
  - 8
  - 9
  - 10
  - 11
  - 12
  - 13
  - 14
  - 15
  - 16
  - 17
  - 18
  - 19
  - 20
  - 21
  - 22
  - 23
  - 24
  - 25
  - 26
  - 27
  - 28
  - 29
  - 30
  - 31
  - 32
  - 33
  - 34
  - 35
  - 36
  - 37
  - 38
  - 39
  - 40
  - 41
  - 42
  - 43
  - 44
  - 45
  - 46
  - 47
  - 48
  - 49
  - 50
  - 51
  - 52
  - 53
  - 54
  - 55
  - 56
  - 57
  - 58
  - 59
  - 60
25. CBC News. Fredericton family doctor calls on province to help cut paperwork, free up time for patients. <https://www.cbc.ca/news/canada/new-brunswick/family-doctors-paperwork-new-brunswick-will-stymiest-medical-society-1.6734457>
26. Apaydin E. Administrative work and job role beliefs in primary care physicians: An analysis of semi-structured interviews. *SAGE Open*. 2020;10(1):2158244019899092. doi:10.1177/2158244019899092
27. Canadian Institute for Health Information. Discharge Abstract Database (DAD) metadata. Accessed October 3, 2023.
28. Canadian Institute for Health Information. National Health Expenditure Trends, 2022 — Methodology Notes. Ottawa, ON: CIHI; 2022.
29. WHO Collaborating Centre for Drug Statistics Methodology: International language for drug utilization research. Accessed April 10, 2023. <https://www.whocc.no>
30. Wagner, AK, Spumerai, SB, Zhang, F and Ross-Degnan, D. Segmented regression analysis of interrupted time series in medication use research. *Journal of Clinical Pharmacology and Therapeutics*. 2002;Aug 27(4):299-309.
31. Archibald MM, Ambagtsheer RC, Casey MG, Lawless M. Using zoom videoconferencing for qualitative data collection: Perceptions and experiences of researchers and participants. *International Journal of Qualitative Methods*. 2019;18:1609406919874596. doi:10.1177/1609406919874596
32. Gruber M, Eberl JM, Lind F, Boomgaarden HG. Qualitative Interviews with irregular migrants in times of COVID-19: Recourse to remote interview techniques as a possible methodological adjustment. *Forum Qualitative Sozialforschung / Forum: Qualitative Social Research*. 2021;22(1). doi:10.17169/fqs-22.1.3563
33. Sandelowski M. Sample size in qualitative research. *Research in Nursing & Health*. 1995;18(2):179-183. doi:10.1002/nur.4770180211
34. Morse JM. Analytic Strategies and Sample Size. *Qualitative Health Research*. 2015;25(10):1317-1318. doi:10.1177/1049732315602867
35. Morse JM. Designing funded qualitative research. In: *Handbook of Qualitative Research*. Sage Publications, Inc; 1994:220-235.
36. Lavergne MR, Goldsmith LJ, Grudniewicz A, et al. Practice patterns among early-career primary care (ECPC) physicians and workforce planning implications: protocol for a mixed methods study. *BMJ Open*. 2019;9(9):e030477. doi:10.1136/bmjopen-2019-030477
37. Hedden L. *Beyond Full-Time Equivalents: Gender Differences in Activity and Practice Patterns for BC's Primary Care Physicians*. PhD Thesis. University of British Columbia; 2015.

- 1  
2  
3  
4  
5  
6  
7  
8  
9  
10  
11  
12  
13  
14  
15  
16  
17  
18  
19  
20  
21  
22  
23  
24  
25  
26  
27  
28  
29  
30  
31  
32  
33  
34  
35  
36  
37  
38  
39  
40  
41  
42  
43  
44  
45  
46  
47  
48  
49  
50  
51  
52  
53  
54  
55  
56  
57  
58  
59  
60
38. Buddeberg-Fischer B, Stamm M, Buddeberg C, et al. The impact of gender and parenthood on physicians' careers - professional and personal situation seven years after graduation. *BMC Health Services Research*. 2010;10(1):40. doi:10.1186/1472-6963-10-40
  39. Jolly S, Griffith KA, DeCastro R, Stewart A, Ubel P, Jaggi R. Gender differences in time spent on parenting and domestic responsibilities by high-achieving young physician-researchers. *Annals of internal medicine*. 2014;160(5):344-353. doi:10.7326/M13-0974
  40. Canadian Institute for Health Information. 2022. <https://www.cihi.ca/en/nurse-practitioners>
  41. Braun V, Clarke V. *Thematic Analysis: A Practical Guide*. Sage Publications Ltd; 2022.
  42. Flick U. Challenges for a New Critical Qualitative Inquiry: Introduction to the Special Issue. *Qualitative Inquiry*. 2017;23(1):3-7. doi:10.1177/1077800416655829
  43. Denzin NK. Critical Qualitative Inquiry. *Qualitative Inquiry*. 2017;12(1). doi:doi.org/10.1177/1077800416681864
  44. Lincoln, Y. S., Lynham, S. A., & Guba, E. G. (2018). Paradigmatic controversies, contradictions, and emerging confluences, revisited. In N. K. Denzin & Y. S. Lincoln (Eds.), *The Sage handbook of qualitative research* (5th ed., pp. 108–150). Thousand Oaks, CA: Sage
  45. Boyland. J. A social constructivist approach to the gathering of empirical data. *Australian Counselling Research Journal*. 2019;30-34.
  46. Boyko JA, Lavis JN, Abelson J, Dobbins M, Carter N. Deliberative dialogues as a mechanism for knowledge translation and exchange in health systems decision-making. *Social Science & Medicine*. 2012;75(11):1938-1945. doi:10.1016/j.socscimed.2012.06.016
  47. Harvey N, Holmes CA. Nominal Group Technique: An effective method for obtaining group consensus. *International Journal of Nursing Practice*. 2012;18(2):188-194.
  48. Potter M, Gordon S, Hamer P. The Nominal Group Technique: a useful consensus methodology in physiotherapy research. *New Zealand Journal of Physiotherapy*. 2004;3(2):70-74.
  49. Guerra CE, McDonald VJ, Ravenell KL, Asch DA, Shea JA. Effect of race on patient expectations regarding their primary care physicians. *Family Practice*. 2007;25(1):49-55. doi:10.1093/fampra/cmn005
  50. Hedden, L., Barer, ML, Cardiff, K, McGrail, KM, Law, MR, Bourgeault, IL. The implications of the feminization of the primary care physician workforce on service supply: a systematic review. *Human Resources Health*. 2014;12:32. <http://www.human-resources-health.com/content/12/1/32>
  51. Bowen S, Graham I. Integrated knowledge translation. In: *Knowledge Translation in Health Care*. John Wiley & Sons, Ltd; 2013:14-23.

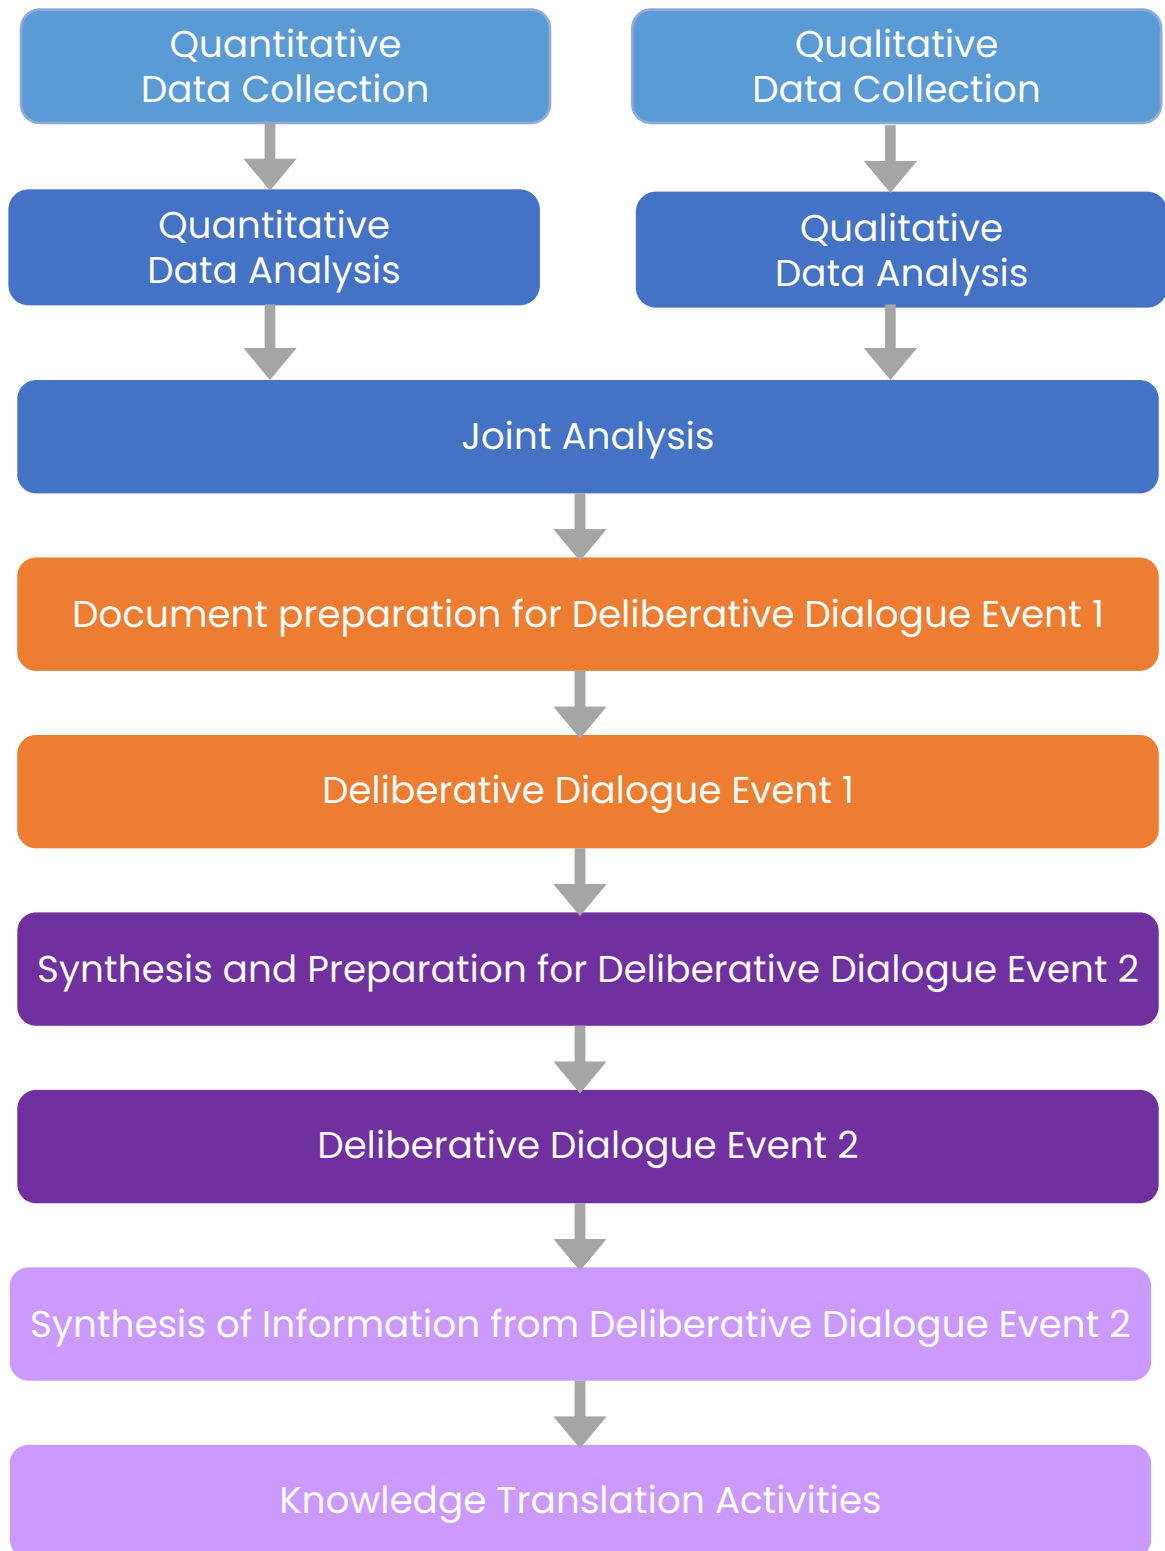

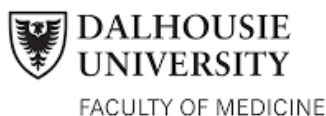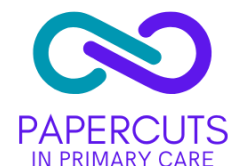**LANDING PAGE for survey**

<https://surveys.dal.ca/opinio/s?s=71694>

**STUDY TITLE:** A Thousand papercuts: Understanding and addressing changing administrative workload in primary care

**PRINCIPAL INVESTIGATOR:** M. Ruth Lavergne, Faculty Researcher  
Dalhousie University, [ruth.lavergne@Dal.ca](mailto:ruth.lavergne@Dal.ca)

Thank you for your interest in participating in an interview for our research study called "A Thousand papercuts: Understanding and addressing changing administrative workload in primary care." In this study we would like to better understand the breadth and distribution of administrative workload in primary care. We would like to learn more about the administrative tasks that family physicians, nurse practitioners, office managers, and office staff perform and how this work has changed over time. We hope that this study will help others to become more aware of the important work that you do and how valuable it is.

To be considered for an interview, please complete this survey and provide us with your contact information and profession. The survey has a short series of optional questions for you to answer. Please answer as many questions as you like. You are not obligated to answer any, although your answers will help us to select participants representing a diversity of practices and locations.

Your completion of the survey implies that you have consented to participate in this research. The information you provide in the survey will be kept confidential. You may exit the survey at any time and your information will not be saved. The survey is administered by Opinio, a tool hosted and supported by Dalhousie University. The survey data from Opinio is stored on Dalhousie University servers in Halifax, Nova Scotia, Canada and is endorsed for use by the Dalhousie Research Ethics Board. The information you give during the survey will be destroyed after the recruitment process has been completed.

If you are invited to participate in an interview, you will be provided with an information sheet about the study and the interview.

## Contact for Questions or Complaints

If you have any concerns or complaints about your rights as a research participant and/or your experiences while participating in this study, you may contact: the Research Ethics Board: [ResearchEthics@nshealth.ca](mailto:ResearchEthics@nshealth.ca)

## CONTACT INFO

Thank you for sharing your information. Please include your name and email address below so that if you are selected for an interview, we can contact you.

1. Name:
2. Please enter your email address. If email is not a suitable method of contact for you, please provide your preferred method and contact information:

## INFORMATION ABOUT YOURSELF

3. Please select the statement that applies to you:

- I am a practising family physician based in Nova Scotia
- I am a practising family physician based in New Brunswick
- I am a practising nurse practitioner based in Nova Scotia
- I am a practising nurse practitioner based in New Brunswick
- I am currently an administrative manager of a primary care clinic in Nova Scotia\*
- I am currently an administrative manager of a primary care clinic in New Brunswick\*
- I currently provide administrative support in a primary care clinic in Nova Scotia\*
- I currently provide administrative support in a primary care clinic in New Brunswick\*
- None of the above

*\*Administrative staff will be re-directed to question 6.*

*If none of the above is selected, an automatic message will pop up:* "Thank you for your interest in this study, however we are currently focusing on family physicians, nurse practitioners and administrative staff in primary care clinics in Nova Scotia and New Brunswick for this survey. If you would like to receive information about study findings, please indicate below the email address we can use to follow up with you."

\_\_\_\_\_ You may also visit our website

<https://www.healthsystemsresearch.ca/papercuts> for information about study outcomes.

1  
2 4a. Do you spend some of your time working in a community-based, longitudinal, comprehensive primary care  
3 clinic (i.e., traditional clinic-based family medicine practice)?

4  Yes

5  No

6  
7  
8  
9 4b. If yes to question 4a, are you responsible for managing or co-managing any/all practice operations (for  
10 example hiring and managing staff, dealing with building maintenance, overseeing all aspects of running  
11 the practice)?

12  Yes

13  No

14  
15  
16  
17  
18 5. What type of payment model are you on when providing community based longitudinal primary care?

19 Check all that apply:

20  Fee for service (FFS)

21  Alternative payment plan (APP)

22  Alternative funding plan (AFP)

23  Capitation

24  Salary

25  Blended

26  Other

27 If other, please specify \_\_\_\_\_

28  
29  
30  
31  
32  
33 6. Is your clinic location:

34  Urban

35  Suburban

36  Rural

37  Other

38 If other, please specify \_\_\_\_\_

39  
40  
41  
42 7. If you practice/work in Nova Scotia, which health zone is your clinic located in?

43  Not applicable to me

44  Central

45  Eastern

46  Northern

47  Western

48  Other

49 If other, please specify \_\_\_\_\_

1  
2 8. If you practice/work in New Brunswick, which health zone is your clinic located in?

3  Not applicable to me

4  Zone 1

5  Zone 2

6  Zone 3

7  Zone 4

8  Zone 5

9  Zone 6

10  Zone 7

11  Other

12 If other, please specify \_\_\_\_\_

13  
14  
15  
16  
17  
18 9. How many years have you been working at your current clinic?

19  less than 2 years

20  between 2-5 years

21  between 6-10 years

22  more than 10 years

23  
24  
25  
26 **The following question is optional. It will help our study team ensure breadth of interview participants.**

27  
28  
29  
30 10. What gender to you identify with?

31  Woman

32  Man

33  Transgender Woman/Trans Feminine

34  Transgender Man/Trans Masculine

35  Gender nonconforming/Nonbinary

36  Gender queer/Gender Fluid

37  Two-spirit

38  Prefer to self-describe \_\_\_\_\_

39  Prefer not to answer

40  
41  
42  
43  
44  
45  
46  
47  
48 **Thank you for sharing your time and experiences with us. If you are selected for an interview, you will be**  
49 **contacted by a member of our team in the near future.**



## Supplemental Study Information

### Papercuts Project

#### Interview Guide

#### Family Physicians & Nurse Practitioners

### Introduction

*Thank you for taking the time to participate in this interview today. Have you read through the information sheet about the study? [If no, the RA will provide verbal overview.] Do you have any questions? [RA responds to questions raised].*

*The interview questions will help us to better understand administrative work in primary care. I will begin with some questions about administrative tasks you do in your day-to-day work. We are interested in learning about tasks which are directly related to patient care as well as those which are not (for example, broader clinic operations). We'd also like to discuss how administrative practices have changed over time.*

*We'll then talk more about what work feels productive in that it contributes to clinic operations or patient care, and what feels unproductive or unnecessarily time consuming. We'd like to hear your thoughts about what changes could be made so that your time is used efficiently, and what the impact of administrative burdens have been on you and the office team. Just so you know, there are about 17 main questions in this interview.*

*If you are ready, I would like to begin recording the interview now. [RA begins recording of Zoom call]. For our records, do I have your consent to start the interview? Thank you.*

### PART ONE

**RA reviews participant's screening summary sheet and notes any clarifications/changes.**

- 1. Can we start off with you briefly describing your practice setting?**
- 2. Can you tell me about your administrative work – what does that include?**
- 3. Have these tasks changed from when you started practicing? In what ways? Why?**
  - Prompt: Has there been an increase or decrease in time spent on those tasks from when you started practicing to now?
  - Prompt: Why do you think that is?

- ◆ Changing patient demographics
- ◆ Increasing chronic illness or patient complexity
- ◆ Changing patient expectations
- ◆ Changing administrative processes required by other parts of the health system (e.g., forms, referral processes, IT platforms)
- ◆ Needs related to non-medical determinants of health and access to social supports

→ Prompt: Can you tell me about changes to admin tasks during COVID-19?

**4. What role does gender play, if any, with respect to administrative workload?**

→ Prompt: Do you think gender shapes patient expectations? How?

→ Prompt: Do you think gender shapes expectations for how work is shared among colleagues? Why is that?

**5. Can you think of anything else about how others may perceive you - that could affect your administrative work? (age, languages spoken, ethnicity in Canada, race, etc.)**

**6. Does administrative work impact the level of morale in your office? How so?**

→ Prompt: Does administrative work impact your own morale?

→ Prompt: Has this changed over time? How? Why?

**7. How has technology impacted your experiences coordinating administrative tasks?**

→ Prompt: What are the barriers, if any, to using technology more efficiently in your practice?

→ Prompt: How does your EHR system shape your administrative work?

→ Prompt: Have you identified areas in which the system could be improved? Can you tell me more about that?

**8. Do you spend time on administrative tasks outside of your regular work day? What does that look like for you?**

→ Prompt: How do you feel about that?

→ Prompt: What strategies have you used in the past to decrease your “extra/overtime” hours?

→ Prompt: How did that go? What could be done differently if you tried something similar again?

**9. Can you comment on whether or not your administrative work impacts your ability to engage in other professional interests? (for example: supervising/mentoring learners, \*engaging in advocacy activities, \*having time for your own professional development, \*community involvement/public health education)**

→ Prompt: Have you taken on more or fewer learners in your practice as the administrative burden has changed?

→ Prompt: Do you mentor your medical learners differently to adapt to administrative demands?

→ Prompt: If you have had to cut back or cut out \*those activities altogether, how has that impacted you? How have others responded to this change?

1  
2  
3  
4  
5 **10. Can you tell me if other team members work with you to manage administrative tasks? What does that look like?**

6 → Prompt: How do you communicate about this work within your team?

7 → Prompt: Are there additional roles other team members could take on?

8 → Prompt: What would need to happen to make that possible?  
9  
10  
11

12  
13 **11. Who makes decisions about changes to administrative processes? How do changes play out?**

14 → Prompt: Can you give me an example within your practice setting?

15 → Prompt: Can you give me an example of changes to administrative processes that were initiated by external  
16 organizations or practices?  
17

18 → Prompt: Who is consulted about these changes?  
19  
20  
21  
22

23 *Now, I'd like to go into further detail about some of the administrative work we've been discussing.*  
24  
25

26 **PART TWO**  
27

28  
29  
30 **12. Reflecting back on what we just talked about, could you tell me which areas of administrative work feels most**  
31 **productive to you? (By productive, we mean good use of your time)**

32 → Prompt: This could include tasks that:

- 33 ● Support access to care for patients
- 34 ● Strengthen clinical relationships
- 35 ● Increase efficiency of your practice
- 36 ● Increase efficiency for the broader system
- 37
- 38
- 39
- 40
- 41
- 42

43 **13. Which aspects of your administrative work are of greatest concern for you?**

44 **For each area of concern:**

- 45 ● What makes this an area of concern for you?
- 46 ● How would you say the volume of this work has changed over time since you've been in practice?
- 47 ● Do other team members help with this work?  
48  
49  
50  
51  
52  
53  
54  
55  
56  
57  
58  
59  
60

1  
2  
3  
4 **14. Can you suggest any strategies that would make this more efficient for you?**

- 5  
6 → Are there low-value processes that can be reduced/eliminated/redirected?  
7  
8 → Are there ways to improve efficiency of processes?  
9  
10 → Are there opportunities to optimize distribution of workload within teams?  
11

12  
13 **15. Are there strategies that could be implemented within your workplace, or would other systems or agencies need**  
14 **to be involved?**  
15

16  
17  
18 **16. Have you tried 'new' strategies in the past? How did that go?**  
19

20  
21  
22 **17. Do you feel that the administrative work you do is recognized and valued by others? Why? Why not?**  
23  
24  
25

26 **WRAP UP**  
27

28 **Do you have anything else you'd like to say about the administrative aspects of your practice?**  
29  
30  
31  
32  
33

34  
35 **RESEARCH ADMINISTRATION**  
36  
37

38  
39 We'd like to send you a cheque as a token of our appreciation for your time today.  
40

41 *Interviewer records mailing address*  
42  
43  
44  
45  
46  
47

48  
49 **Thank you for speaking with me today.**  
50  
51  
52  
53  
54  
55  
56  
57

**Papercuts project****Interview Guide****Administrative Staff****Introduction**

*Thank you for taking the time to participate in this interview today. Have you read through the information sheet about the study? [If no, the RA will provide verbal overview.] Do you have any questions? [RA responds to questions raised.]*

*The interview questions will help us to better understand administrative work in primary care. I will begin with some questions about administrative tasks you do in your day-to-day work. We are interested in learning about tasks which are directly related to patient care as well as those which are not (for example, broader clinic operations). We'd also like to discuss how administrative practices have changed over time.*

*We'll then talk more about what work feels productive in that it contributes to clinic operations or patient care, and what feels unproductive or unnecessarily time consuming. We'd like to hear your thoughts about what changes could be made so that your time is used efficiently, and what the impact of administrative burdens have been on you and the office team. Just so you know, there are about 17 main questions in this interview.*

*I would like to begin recording this session now. Is that alright with you? [RA begins recording of Zoom call]. For our records, do I have your consent to start the interview? Thank you.*

**PART ONE****RA reviews participant's screening summary sheet and notes any clarifications/changes****1. What is your job title?**

- Does that title fit with what you actually do in your role? Why, why not?

**2. Could you tell me about the office where you work?**

- How long have you been working there?
- Is it just you, or are there others on the administrative team?
- Briefly, how do their roles differ from yours?
- What training is provided?

- 1  
2  
3 **3. We'll go into the details of your specific work responsibilities a little later, but for now, could you give me a**  
4 **brief overview of your tasks? Could you tell me what a typical work week is like for you?**  
5  
6  
7 **4. Have these tasks changed over time since you've been working there? In what ways? Why?**  
8  
9 → Prompt: Has there been an increase or decrease in time spent on those tasks from when you started working  
10 there to now?  
11  
12 → Prompt: Why do you think that is?  
13  
14 ◆ Changing patient demographics  
15  
16 ◆ Increasing chronic illness or patient complexity  
17  
18 ◆ Changing patient expectations  
19  
20 ◆ Changing administrative processes required by other parts of the health system (e.g., forms, referral  
21 processes, IT platforms)  
22  
23 ◆ Needs related to non-medical determinants of health and access to social supports  
24  
25 → Prompt: Can you tell me about changes to admin tasks during COVID-19?  
26  
27  
28 **5. What role does gender play, if any, with respect to administrative workload?**  
29  
30 → Prompt: Do you think gender shapes patient expectations or how patients treat you?  
31  
32 → Prompt: Do you think gender shapes expectations for how work is shared among colleagues?  
33  
34 **6. Can you think of anything else about how others may perceive you - that could affect your administrative work?**  
35 (age, languages spoken, ethnicity in Canada, race, etc.)  
36  
37  
38  
39 **7. Do you feel that the administrative work you do is recognized and valued by others? Why? Why not?**  
40  
41  
42  
43 **8. Back to administrative tasks now - Which of your administrative activities do you enjoy most? Why?**  
44  
45  
46 **9. Which of your tasks, if any, do you find challenging? Why?**  
47  
48  
49 **10. How has technology impacted your experiences coordinating those administrative tasks?**  
50  
51 → Prompt: What are the barriers, if any, to using technology more efficiently in your office?  
52  
53 → Prompt: How does your EHR system shape your administrative work?  
54  
55 → Prompt: Have you identified areas in which the system could be improved? Can you tell me more about that?  
56  
57  
58  
59  
60

1  
2  
3 **11. Is anyone else in the office familiar enough with your admin responsibilities to cover for you?**

4 → Prompt: How has that worked? What was the impact?  
5  
6  
7

8 **12. What happens when staff who have administrative responsibilities come and go?**

9 → Prompts: Who manages the training?

10 ◆ How has that gone in the past?

11 → Prompts: Do you have an office procedures manual? Can you tell me more about that?

12 ◆ Who maintains it?

13 ◆ How is that going?/ Is it used often?

14 ◆ Have there been any challenges along the way? Can you tell me more about that?  
15  
16  
17  
18  
19

20 **13. Do you have team meetings?**

21 **If yes**

22 → Prompt: How often; what topics are discussed?

23 → Prompt: Are your comments/suggestions listened to and acted on?

24 → Prompt: Can you tell me more about that?

25 → Prompt: What kinds of changes have been made to office procedures as a result of these meetings and who  
26 initiated the changes?

27 → Prompt: Anything else you'd like to say about team meetings?  
28  
29

30 **If no**

31 → Prompt: Why is that?

32 → Prompt: Did you ever have team meetings – what happened and why?

33 → Prompt: Do you chat informally and does that work well for you? Why, Why not?

34 → Prompt: Is there anything else you'd like to say about office communication and how it affects your work?  
35  
36  
37  
38  
39  
40  
41  
42

43 **PART TWO**

44  
45 **14. Reflecting back on what we just talked about, could you tell me which areas of administrative work feels most**  
46 **productive to you?**

47 a. Prompt: This could include tasks that:

48 i. Support access to care for patients

49 ii. Strengthen patient and other relationships

50 iii. Increase efficiency of the office / practice

51 iv. Increase efficiency for the broader system  
52  
53  
54  
55  
56  
57  
58  
59  
60

1  
2  
3 **15. Which areas of administrative work are of greatest concern for you?**

4 **For each area of concern:**

- 5  
6 a. What makes this an area of concern for you?  
7  
8 b. How would you say the volume of this work has changed over time since you've been working there?  
9  
10 c. What is your process?  
11  
12 d. Do other team members help with this work?  
13  
14 e. Can you suggest any strategies that would make this more efficient for you?  
15     ○ Are there low-value processes that can be reduced/eliminated?  
16     ○ Are there ways to improve efficiency of processes?  
17  
18 f. Are there opportunities to optimize distribution of workload within teams?  
19  
20 g. Are these strategies that could be implemented within your workplace, or would other systems or agencies need  
21 to be involved?  
22  
23 h. Have you tried new strategies in the past? How did that go?  
24  
25

26 **16. Do you have anything else you'd like to tell us about your work in the office?**

27  
28  
29  
30 **17. Is there anything else you think is important for us to know?**

31  
32  
33  
34 **Research Administration:**

35 **We'd like to send you a token of our appreciation for your time today.**

36  
37 **What address should we send it to?**

38  
39  
40  
41 **Thank you so much for speaking with me today.**  
42  
43  
44  
45  
46  
47  
48  
49  
50  
51  
52  
53  
54  
55  
56  
57  
58  
59  
60
