# Supplementary material for: Understanding and addressing changing administrative workload in primary care in Canada: protocol for a mixed-method study
Source: PubMed Central journal article supplement — BMJ Open. 2023 Dec 12;13(12):e076917. doi: 10.1136/bmjopen-2023-076917 (PMC10729089; doi:10.1136/bmjopen-2023-076917), 2023-12-12
Supplement: bmjopen-2023-076917supp002.pdf [file bmjopen-2023-076917supp002.pdf]

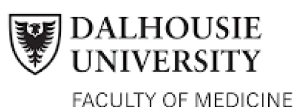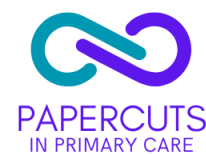**LANDING PAGE for survey**

<https://surveys.dal.ca/opinio/s?s=71694>

**STUDY TITLE:** A Thousand papercuts: Understanding and addressing changing administrative workload in primary care

**PRINCIPAL INVESTIGATOR:** M. Ruth Lavergne, Faculty Researcher  
Dalhousie University, [ruth.lavergne@Dal.ca](mailto:ruth.lavergne@Dal.ca)

Thank you for your interest in participating in an interview for our research study called “A Thousand papercuts: Understanding and addressing changing administrative workload in primary care.” In this study we would like to better understand the breadth and distribution of administrative workload in primary care. We would like to learn more about the administrative tasks that family physicians, nurse practitioners, office managers, and office staff perform and how this work has changed over time. We hope that this study will help others to become more aware of the important work that you do and how valuable it is.

To be considered for an interview, please complete this survey and provide us with your contact information and profession. The survey has a short series of optional questions for you to answer. Please answer as many questions as you like. You are not obligated to answer any, although your answers will help us to select participants representing a diversity of practices and locations.

Your completion of the survey implies that you have consented to participate in this research. The information you provide in the survey will be kept confidential. You may exit the survey at any time and your information will not be saved. The survey is administered by Opinio, a tool hosted and supported by Dalhousie University. The survey data from Opinio is stored on Dalhousie University servers in Halifax, Nova Scotia, Canada and is endorsed for use by the Dalhousie Research Ethics Board. The information you give during the survey will be destroyed after the recruitment process has been completed.

If you are invited to participate in an interview, you will be provided with an information sheet about the study and the interview.

### Contact for Questions or Complaints

If you have any concerns or complaints about your rights as a research participant and/or your experiences while participating in this study, you may contact: the Research Ethics Board: [ResearchEthics@nshealth.ca](mailto:ResearchEthics@nshealth.ca)

### CONTACT INFO

Thank you for sharing your information. Please include your name and email address below so that if you are selected for an interview, we can contact you.

1. Name:
2. Please enter your email address. If email is not a suitable method of contact for you, please provide your preferred method and contact information:

### INFORMATION ABOUT YOURSELF

3. Please select the statement that applies to you:
  - I am a practising family physician based in Nova Scotia
  - I am a practising family physician based in New Brunswick
  - I am a practising nurse practitioner based in Nova Scotia
  - I am a practising nurse practitioner based in New Brunswick
  - I am currently an administrative manager of a primary care clinic in Nova Scotia\*
  - I am currently an administrative manager of a primary care clinic in New Brunswick\*
  - I currently provide administrative support in a primary care clinic in Nova Scotia\*
  - I currently provide administrative support in a primary care clinic in New Brunswick\*
  - None of the above

*\*Administrative staff will be re-directed to question 6.*

*If none of the above is selected, an automatic message will pop up:* “Thank you for your interest in this study, however we are currently focusing on family physicians, nurse practitioners and administrative staff in primary care clinics in Nova Scotia and New Brunswick for this survey. If you would like to receive information about study findings, please indicate below the email address we can use to follow up with you.”

\_\_\_\_\_ You may also visit our website  
<https://www.healthsystemsresearch.ca/papercuts> for information about study outcomes.

4a. Do you spend some of your time working in a community-based, longitudinal, comprehensive primary care clinic (i.e., traditional clinic-based family medicine practice)?

Yes

No

4b. If yes to question 4a, are you responsible for managing or co-managing any/all practice operations (for example hiring and managing staff, dealing with building maintenance, overseeing all aspects of running the practice)?

Yes

No

5. What type of payment model are you on when providing community based longitudinal primary care?

Check all that apply:

Fee for service (FFS)

Alternative payment plan (APP)

Alternative funding plan (AFP)

Capitation

Salary

Blended

Other

If other, please specify \_\_\_\_\_

6. Is your clinic location:

Urban

Suburban

Rural

Other

If other, please specify \_\_\_\_\_

7. If you practice/work in Nova Scotia, which health zone is your clinic located in?

Not applicable to me

Central

Eastern

Northern

Western

Other

If other, please specify \_\_\_\_\_

8. If you practice/work in New Brunswick, which health zone is your clinic located in?

- Not applicable to me
- Zone 1
- Zone 2
- Zone 3
- Zone 4
- Zone 5
- Zone 6
- Zone 7
- Other

If other, please specify \_\_\_\_\_

9. How many years have you been working at your current clinic?

- less than 2 years
- between 2-5 years
- between 6-10 years
- more than 10 years

**The following question is optional. It will help our study team ensure breadth of interview participants.**

10. What gender do you identify with?

- Woman
- Man
- Transgender Woman/Trans Feminine
- Transgender Man/Trans Masculine
- Gender nonconforming/Nonbinary
- Gender queer/Gender Fluid
- Two-spirit
- Prefer to self-describe \_\_\_\_\_
- Prefer not to answer

**Thank you for sharing your time and experiences with us. If you are selected for an interview, you will be contacted by a member of our team in the near future.**
